# Supplementary material
Source: PubMed Central journal article supplement (PMC4062924)
Supplement: NIHMS580236-supplement-Appendix.pdf [file NIHMS580236-supplement-Appendix.pdf]

## **Appendix: Antidepressant Use in Pregnancy and the Risk of Cardiac Defects**

Krista F. Huybrechts, MS PhD

Kristin Palmsten, ScD

Jerry Avorn, MD

LeeS.Cohen, MD

Lewis B. Holmes, MD

Jessica M. Franklin, PhD

Helen Mogun, MS

Raisa Levin, MS

Mary Kowal, BA

SokoSetoguchi, MD DrPh

Sonia Hernandez-Diaz, MD DrPH

## **Table of Contents**

|           |                                                                                                                                                                                                                                                                                    |    |
|-----------|------------------------------------------------------------------------------------------------------------------------------------------------------------------------------------------------------------------------------------------------------------------------------------|----|
| Table S1  | Antidepressant Medications.....                                                                                                                                                                                                                                                    | 4  |
| Table S2  | ICD-9 Diagnostic codes used to identify cardiac malformation.....                                                                                                                                                                                                                  | 5  |
| Table S3  | Cardiac procedure and surgery codes used in the outcome definition.....                                                                                                                                                                                                            | 7  |
| Table S4  | Dose levels for individual antidepressant medications based on Goodman & Gilman’s usual dose range .....                                                                                                                                                                           | 8  |
| Table S5  | Cohort characteristics for SSRIs; overall unadjusted and depression restricted adjusted. Medicaid Analytic eXtract, 2000-2007. ....                                                                                                                                                | 9  |
| Table S6  | Cohort characteristics for TCAs; overall unadjusted and depression restricted adjusted. Medicaid Analytic eXtract, 2000-2007. ....                                                                                                                                                 | 11 |
| Table S7  | Cohort characteristics for SNRIs; overall unadjusted and depression restricted adjusted. Medicaid Analytic eXtract, 2000-2007. ....                                                                                                                                                | 13 |
| Table S8  | Cohort characteristics for other antidepressants; overall unadjusted and depression restricted adjusted. Medicaid Analytic eXtract, 2000-2007. ....                                                                                                                                | 15 |
| Table S9  | Cohort characteristics for bupropion; overall unadjusted and depression restricted adjusted. Medicaid Analytic eXtract, 2000-2007. ....                                                                                                                                            | 17 |
| Table S10 | Cohort characteristics for paroxetine; overall unadjusted and depression restricted adjusted. Medicaid Analytic eXtract, 2000-2007. ....                                                                                                                                           | 19 |
| Table S11 | Cohort characteristics for sertraline; overall unadjusted and depression restricted adjusted. Medicaid Analytic eXtract, 2000-2007. ....                                                                                                                                           | 21 |
| Table S12 | Cohort characteristics for fluoxetine; overall unadjusted and depression restricted adjusted. Medicaid Analytic eXtract, 2000-2007. ....                                                                                                                                           | 23 |
| Table S13 | Cohort characteristics for all antidepressants combined; overall unadjusted and depression restricted adjusted. Medicaid Analytic eXtract, 2000-2007. ....                                                                                                                         | 25 |
| Table S14 | Absolute risk for congenital cardiac malformations in women with and without antidepressant exposure by class; depression restricted cohort. Medicaid Analytic eXtract, 2000-2007. ....                                                                                            | 27 |
| Table S15 | Relative risks and 95% confidence intervals comparing the risk for cardiac malformations between exposed and unexposed women with conventional PS and high-dimensional PS adjustment; restricted to women with depression diagnosis. Medicaid Analytic eXtract 2000-2007.....      | 28 |
| Table S16 | Relative risks and 95% confidence intervals comparing the risk for cardiac malformations between exposed and unexposed women, stratified by age and race; restricted to women with depression diagnosis with PS adjustment. Medicaid Analytic eXtract 2000-2007.....               | 30 |
| Table S17 | Relative risks and 95% confidence intervals comparing the risk for cardiac malformations between exposed and unexposed women, stratified by low, medium, and high dose; restricted to women with depression diagnosis with PS adjustment. Medicaid Analytic eXtract 2000-2007..... | 31 |

|           |                                                                                                                                                                                                                                                                                                                                      |    |
|-----------|--------------------------------------------------------------------------------------------------------------------------------------------------------------------------------------------------------------------------------------------------------------------------------------------------------------------------------------|----|
| Table S18 | Relative risks and 95% confidence intervals comparing the risk for cardiac malformations between exposed and unexposed women, varying the exposure definitions; restricted to women with depression diagnosis with PS adjustment. Medicaid Analytic eXtract 2000-2007.....                                                           | 33 |
| Table S19 | Relative risks and 95% confidence intervals comparing the risk for cardiac malformations between exposed and unexposed women, varying the outcome definitions; restricted to women with depression diagnosis with PS adjustment. Medicaid Analytic eXtract 2000-2007.....                                                            | 35 |
| Table S20 | Probabilistic bias analyses comparing the risk for cardiac malformations between exposed and unexposed women, using the positive predictive value (PPV) for any cardiac malformation from the internal validation study; restricted to women with depression diagnosis with PS adjustment. Medicaid Analytic eXtract 2000-2007. .... | 37 |
|           | Quantification of the potential impact of missing terminations.....                                                                                                                                                                                                                                                                  | 38 |

**Table S1 Antidepressant Medications**

| <b>Antidepressant Medication Class</b> | <b>Antidepressant Generic Name</b> |
|----------------------------------------|------------------------------------|
| SSRI                                   | Citalopram                         |
|                                        | Escitalopram                       |
|                                        | Fluoxetine                         |
|                                        | Fluvoxamine                        |
|                                        | Paroxetine                         |
|                                        | Sertraline                         |
| SNRI                                   | Duloxetine                         |
|                                        | Venlafaxine                        |
| Bupropion                              | Bupropion                          |
| TCA                                    | Amitriptyline                      |
|                                        | Amoxapine                          |
|                                        | Clomipramine                       |
|                                        | Desipramine                        |
|                                        | Doxepin                            |
|                                        | Imipramine                         |
|                                        | Maprotiline                        |
|                                        | Nortriptyline                      |
|                                        | Protriptyline                      |
|                                        | Trimipramine                       |
|                                        | Other                              |
| Nefazodone                             |                                    |
| Selegiline                             |                                    |
| Trazodone                              |                                    |

**Table S2 ICD-9 Diagnostic codes used to identify cardiac malformation**

| <b>ICD-9 Diagnosis</b>             |                                                                       |
|------------------------------------|-----------------------------------------------------------------------|
| <b>Other cardiac malformation*</b> |                                                                       |
| 745                                | Bulbus Cordis Anomalies And Anomalies Of Cardiac Septal Closure       |
| 745.0x                             | Common Truncus                                                        |
| 745.1x                             | Transposition Of Great Vessels                                        |
| 745.10                             | Complete Transposition Of Great Vessels                               |
| 745.11                             | Double Outlet Right Ventricle                                         |
| 745.12                             | Corrected Transposition Of Great Vessels                              |
| 745.19                             | Other Transposition Of Great Vessels                                  |
| 745.2x                             | Tetralogy Of Fallot                                                   |
| 745.3x                             | Common Ventricle                                                      |
| 745.6x                             | Endocardial Cushion Defects                                           |
| 745.60                             | Endocardial Cushion Defect Unspecified Type                           |
| 745.61                             | Ostium Primum Defect                                                  |
| 745.69                             | Other Endocardial Cushion Defects                                     |
| 745.7x                             | Cor Biloculare                                                        |
| 745.8x                             | Other Bulbus Cordis Anomalies And Anomalies Of Cardiac Septal Closure |
| 745.9x                             | Unspecified Defect Of Septal Closure                                  |
| 746                                | Other Congenital Anomalies Of Heart                                   |
| 746.00                             | Congenital Pulmonary Valve Anomaly Unspecified                        |
| 746.1x                             | Tricuspid Atresia And Stenosis Congenital                             |
| 746.2x                             | Ebstein's Anomaly                                                     |
| 746.3x                             | Congenital Stenosis Of Aortic Valve                                   |
| 746.5x                             | Congenital Mitral Stenosis                                            |
| 746.7x                             | Hypoplastic Left Heart Syndrome                                       |
| 746.8                              | Other Specified Congenital Anomalies Of Heart                         |
| 746.80                             | Subaortic Stenosis Congenital                                         |
| 746.82                             | Cor Triatriatum                                                       |
| 746.84                             | Congenital Obstructive Anomalies Of Heart Not Elsewhere Classified    |
| 746.85                             | Coronary Artery Anomaly Congenital                                    |
| 746.86                             | Congenital Heart Block                                                |
| 746.87                             | Malposition Of Heart And Cardiac Apex                                 |
| 746.89                             | Other Specified Congenital Anomalies Of Heart                         |
| 747                                | Other Congenital Anomalies Of Circulatory System                      |
| 747.1x                             | Coarctation Of Aorta                                                  |
| 747.10                             | Coarctation Of Aorta (Preductal) (Postductal)                         |
| 747.11                             | Interruption Of Aortic Arch                                           |
| 747.2x                             | Other Congenital Anomalies Of Aorta                                   |
| 747.20                             | Congenital Anomaly Of Aorta Unspecified                               |

|        |                                               |
|--------|-----------------------------------------------|
| 747.21 | Congenital Anomalies Of Aortic Arch           |
| 747.22 | Congenital Atresia And Stenosis Of Aorta      |
| 747.29 | Other Congenital Anomalies Of Aorta           |
| 747.4x | Congenital Anomalies Of Great Veins           |
| 747.40 | Congenital Anomaly Of Great Veins Unspecified |
| 747.41 | Total Anomalous Pulmonary Venous Connection   |
| 747.42 | Partial Anomalous Pulmonary Venous Connection |
| 747.49 | Other Anomalies Of Great Veins                |

Persistent Fetal Circulation

747.83

|        |                                         |
|--------|-----------------------------------------|
| 746.9x | Unspecified Congenital Anomaly Of Heart |
|--------|-----------------------------------------|

**Right Ventricular Outflow Obstruction**

|                                                                          |                                                                                                                                                                                         |
|--------------------------------------------------------------------------|-----------------------------------------------------------------------------------------------------------------------------------------------------------------------------------------|
| 746.01                                                                   | Atresia Of Pulmonary Valve Congenital                                                                                                                                                   |
| 746.09                                                                   | Other Congenital Anomalies Of Pulmonary Valve                                                                                                                                           |
| 746.83                                                                   | Infundibular Pulmonic Stenosis Congenital                                                                                                                                               |
| 747.3x and no preterm delivery codes in first 60 days following delivery | Congenital Anomalies Of Pulmonary Artery, Pulmonary Artery Coarctation And Atresia, Pulmonary Arteriovenous Malformation, Other Anomalies Of Pulmonary Artery And Pulmonary Circulation |
| 746.02 and no preterm delivery codes in first 60 days following delivery | Stenosis of pulmonary valve congenital                                                                                                                                                  |

**Ventricular Septal Defects**

|        |                           |
|--------|---------------------------|
| 745.4x | Ventricular Septal Defect |
|--------|---------------------------|

---

\* 747.81 (Anomalies of cerebrovascular system) typically indicates a maternal malformation and was therefore excluded

**Table S3 Cardiac procedure and surgery codes used in the outcome definition**

| <b>ICD-9</b>                                                                 | <b>Description</b>                                                                                                                                                                                       |
|------------------------------------------------------------------------------|----------------------------------------------------------------------------------------------------------------------------------------------------------------------------------------------------------|
| 35.x                                                                         | Operations on valves and septa of heart                                                                                                                                                                  |
| 36.x                                                                         | Operations on vessels of heart                                                                                                                                                                           |
| 37.x<br>except for 37.94                                                     | Other operations on heart and pericardium                                                                                                                                                                |
| 38.x<br>except for 38.18, 38.91, 38.92, 38.93,<br>38.94, 38.95, 38.98, 38.99 | Incision, excision, and occlusion of vessels                                                                                                                                                             |
| 39.x<br>except for 39.27, 39.50, 39.95, 39.98                                | Other operations on vessels                                                                                                                                                                              |
| <b>CPT-4</b>                                                                 | <b>Description</b>                                                                                                                                                                                       |
| 00560                                                                        | ANESTHESIA FOR PROCEDURES ON HEART, PERICARDIAL SAC, AND GREAT VESSELS OF CHEST; WITHOUT PUMP OXYGENATOR                                                                                                 |
| 00561                                                                        | ANESTHESIA FOR PROCEDURES ON HEART, PERICARDIAL SAC, AND GREAT VESSELS OF CHEST; WITH PUMP OXYGENATOR, YOUNGER THAN 1 YEAR OF AGE                                                                        |
| 00563                                                                        | ANESTHESIA FOR PROCEDURES ON HEART, PERICARDIAL SAC, AND GREAT VESSELS                                                                                                                                   |
| 33300-35190                                                                  | Various cardiac surgeries/procedures.                                                                                                                                                                    |
| 92992                                                                        | ATRIAL SEPTECTOMY OR SEPTOSTOMY; TRANSVENOUS METHOD, BALLOON (EG, RASHKIND TYPE) (INCLUDES CARDIAC CATHETERIZATION)                                                                                      |
| 92993                                                                        | ATRIAL SEPTECTOMY OR SEPTOSTOMY; BLADE METHOD (PARK SEPTOSTOMY) (INCLUDES CARDIAC CATHETERIZATION)                                                                                                       |
| 93530                                                                        | RIGHT HEART CATHETERIZATION, FOR CONGENITAL CARDIAC ANOMALIES                                                                                                                                            |
| 93531                                                                        | COMBINED RIGHT HEART CATHETERIZATION AND RETROGRADE LEFT HEART CATHETERIZATION, FOR CONGENITAL CARDIAC ANOMALIES                                                                                         |
| 93532                                                                        | COMBINED RIGHT HEART CATHETERIZATION AND TRANSSEPTAL LEFT HEART CATHETERIZATION THROUGH INTACT SEPTUM WITH OR WITHOUT RETROGRADE LEFT HEART CATHETERIZATION, FOR CONGENITAL CARDIAC ANOMALIES            |
| 93533                                                                        | COMBINED RIGHT HEART CATHETERIZATION AND TRANSSEPTAL LEFT HEART CATHETERIZATION THROUGH EXISTING SEPTAL OPENING, WITH OR WITHOUT RETROGRADE LEFT HEART CATHETERIZATION, FOR CONGENITAL CARDIAC ANOMALIES |

**Table S4 Dose levels for individual antidepressant medications based on Goodman & Gilman's usual dose range**

| <b>Class</b> | <b>Drug</b>   | <b>Low Strength (mg/day)</b> | <b>Medium Strength (mg/day)</b> | <b>High Strength</b> |
|--------------|---------------|------------------------------|---------------------------------|----------------------|
| SSRI         | Citalopram    | <20                          | ≥20 and ≤30                     | >30                  |
|              | Escitalopram  | <10                          | ≥10 and ≤15                     | >15                  |
|              | Fluoxetine    | <20                          | ≥20 and ≤30                     | >30                  |
|              | Fluvoxamine   | <100                         | ≥100 and ≤150                   | >150                 |
|              | Paroxetine    | <20                          | ≥20 and ≤30                     | >30                  |
|              | Sertraline    | <100                         | ≥100 and ≤125                   | >125                 |
| SNRI         | Venlafaxine   | <75                          | ≥75 and ≤150                    | >150                 |
|              | Duloxetine    | <80                          | ≥80 and ≤90                     | >90                  |
| Bupropion    | Bupropion     | <200                         | ≥200 and ≤250                   | >250                 |
| TCA          | Amoxapine     | <200                         | ≥200 and ≤250                   | >250                 |
|              | Desipramine   | <100                         | ≥100 and ≤150                   | >150                 |
|              | Maprotiline   | <100                         | ≥100 and ≤125                   | >125                 |
|              | Nortriptyline | <75                          | ≥75 and ≤112.5                  | >112.5               |
|              | Amitriptyline | <100                         | ≥100 and ≤150                   | >150                 |
|              | Clomipramine  | <100                         | ≥100 and ≤150                   | >150                 |
|              | Doxepin       | <100                         | ≥100 and ≤150                   | >150                 |
|              | Imipramine    | <100                         | ≥100 and ≤150                   | >150                 |
|              | Trimipramine  | <75                          | ≥75 and ≤150                    | >150                 |
|              | Protriptyline | <15                          | ≥15 and ≤30                     | >30                  |
| Other        | Mirtazapine   | <15                          | ≥15 and ≤30                     | >30                  |
|              | Nefazodone    | <200                         | ≥200 and ≤300                   | >300                 |
|              | Trazodone     | <150                         | ≥150 and ≤175                   | >175                 |
|              | Selegiline    | <10                          | 10                              | >10                  |

Dose levels were defined according to Goodman & Gilman's usual dose (mg/day)<sup>1</sup>: low < lowest usual dose, medium ≤ the midpoint of the usual dose range, high > the midpoint of the usual dose range.



**Table S5 Cohort characteristics for SSRIs; overall unadjusted and depression restricted adjusted. Medicaid Analytic eXtract, 2000-2007.**

| Characteristic                             | Overall cohort, unadjusted |                 | Depression restricted cohort, Accounting for PS strata <sup>(1)</sup> |                   |
|--------------------------------------------|----------------------------|-----------------|-----------------------------------------------------------------------|-------------------|
|                                            | SSRI                       | Unexposed       | SSRI                                                                  | Unexposed         |
| N                                          | 46,144                     | 885,115         | 36,778                                                                | 180,564           |
| Age, mean (SD)                             | 25.59 (5.94)               | 23.85 (5.75)    | 25.54 (5.96)                                                          | 25.32 (53.09)     |
| Year of delivery, N (%)                    |                            |                 |                                                                       |                   |
| 2000-2002                                  | 8,103 (17.56)              | 187,511 (21.19) | 5,822 (15.83)                                                         | 29,134 (16.13)    |
| 2003-2005                                  | 24,652 (53.42)             | 426,522 (48.19) | 19,534 (53.11)                                                        | 95,448 (52.86)    |
| 2006-2007                                  | 13,389 (29.02)             | 271,082 (30.63) | 11,422 (31.06)                                                        | 55,982 (31.00)    |
| Race, N (%)                                |                            |                 |                                                                       |                   |
| White                                      | 34,098 (73.89)             | 339,144 (38.32) | 27,299 (74.23)                                                        | 136,506 (75.60)   |
| Black                                      | 5,438 (11.78)              | 313,369 (35.40) | 4,193 (11.40)                                                         | 19,380 (10.73)    |
| Hispanic                                   | 4,145 (8.98)               | 164,317 (18.56) | 3,261 (8.87)                                                          | 15,017 (8.32)     |
| Other or unknown                           | 2,463 (5.34)               | 68,285 (7.71)   | 2,025 (5.51)                                                          | 9,661 (5.35)      |
| Multipara, N (%)                           | 36,910 (79.99)             | 706,656 (79.84) | 28,937 (78.68)                                                        | 142,588 (78.97)   |
| Multiple gestation, N (%)                  | 1,780 (3.86)               | 31,258 (3.53)   | 1,377 (3.74)                                                          | 6,711 (3.72)      |
| Preterm birth, N (%) <sup>(2)</sup>        | 6,470 (14.02)              | 98,886 (11.17)  | 5,250 (14.27)                                                         | 25,299 (14.01)    |
| Antidepressant indications, N (%)          |                            |                 |                                                                       |                   |
| Depression                                 | 36,783 (79.71)             | 180,564 (20.40) | 36,778 (100.00%)                                                      | 180,564 (100.00%) |
| Other mental health disorders              | 4,430 (9.60)               | 17,325 (1.96)   | 3,907 (10.62)                                                         | 19,389 (10.74)    |
| Pain related diagnoses                     | 4,376 (9.48)               | 24,527 (2.77)   | 3,634 (9.88)                                                          | 18,232 (10.10)    |
| Sleep disorders                            | 1,487 (3.22)               | 3,319 (0.38)    | 1,236 (3.36)                                                          | 6,419 (3.55)      |
| Premenstrual tension syndrome              | 175 (0.38)                 | 453 (0.05)      | 102 (0.28)                                                            | 519 (0.29)        |
| Smoking                                    | 2,451 (5.31)               | 17,769 (2.01)   | 2,154 (5.86)                                                          | 10,634 (5.89)     |
| Chronic fatigue syndrome                   | 3,603 (7.81)               | 20,623 (2.33)   | 2,919 (7.94)                                                          | 14,806 (8.20)     |
| Proxies for depression severity, mean (SD) |                            |                 |                                                                       |                   |
| Number of outpatient depression diagnoses  | 2.76 (6.51)                | 0.24 (2.04)     | 3.46 (7.12)                                                           | 3.31 (20.25)      |

| Characteristic                                                              | Overall cohort, unadjusted |                 | Depression restricted cohort, Accounting for PS strata <sup>(1)</sup> |                |
|-----------------------------------------------------------------------------|----------------------------|-----------------|-----------------------------------------------------------------------|----------------|
|                                                                             | SSRI                       | Unexposed       | SSRI                                                                  | Unexposed      |
| Number of inpatient depression diagnoses                                    | 0.05 (0.26)                | 0.00 (0.06)     | 0.06 (0.29)                                                           | 0.06 (0.98)    |
| Chronic maternal illness, N (%)                                             |                            |                 |                                                                       |                |
| Hypertension                                                                | 1,656 (3.59)               | 12,573 (1.42)   | 1,319 (3.59)                                                          | 6,606 (3.66)   |
| Diabetes                                                                    | 1,288 (2.79)               | 10,628 (1.20)   | 997 (2.71)                                                            | 4,957 (2.75)   |
| Gestational diabetes                                                        | 494 (1.07)                 | 5,483 (0.62)    | 375 (1.02)                                                            | 1,854 (1.03)   |
| Epilepsy                                                                    | 412 (0.89)                 | 2,388 (0.27)    | 343 (0.93)                                                            | 1,783 (0.99)   |
| Renal disease                                                               | 76 (0.16)                  | 819 (0.09)      | 64 (0.17)                                                             | 325 (0.18)     |
| Other psychotropic medications, N (%)                                       |                            |                 |                                                                       |                |
| Anticonvulsants                                                             | 7,353 (15.93)              | 31,681 (3.58)   | 6,654 (18.09)                                                         | 33,599 (18.61) |
| Antipsychotics                                                              | 9,534 (20.66)              | 48,657 (5.50)   | 8,621 (23.44)                                                         | 42,987 (23.81) |
| Anxiolytics                                                                 | 3,148 (6.82)               | 8,189 (0.93)    | 2,895 (7.87)                                                          | 14,320 (7.93)  |
| Benzodiazepines                                                             | 14,560 (31.55)             | 49,063 (5.54)   | 12,856 (34.96)                                                        | 63,100 (34.95) |
| Other hypnotics                                                             | 13,277 (28.77)             | 115,608 (13.06) | 11,540 (31.38)                                                        | 56,323 (31.19) |
| Barbiturates                                                                | 3,764 (8.16)               | 26,030 (2.94)   | 3,097 (8.42)                                                          | 15,756 (8.73)  |
| Other medications, N (%)                                                    |                            |                 |                                                                       |                |
| Antidiabetics                                                               | 1,682 (3.65)               | 15,364 (1.74)   | 1,303 (3.54)                                                          | 6,449 (3.57)   |
| Antihypertensives                                                           | 6,814 (14.77)              | 54,170 (6.12)   | 5,588 (15.19)                                                         | 28,078 (15.55) |
| Suspected teratogenics                                                      | 3,508 (7.60)               | 26,967 (3.05)   | 2,806 (7.63)                                                          | 14,345 (7.94)  |
| Number of distinct prescription drugs, excluding antidepressants, mean (SD) | 3.47 (3.35)                | 1.45 (2.10)     | 3.56 (3.41)                                                           | 3.47 (13.03)   |

<sup>(1)</sup> To account for PS, the untreated observations were weighted using the distribution of the treated among PS strata

<sup>(2)</sup> Relates to current pregnancy

**Table S6 Cohort characteristics for TCAs; overall unadjusted and depression restricted adjusted. Medicaid Analytic eXtract, 2000-2007.**

| Characteristic                             | Overall cohort, unadjusted |                 | Depression restricted cohort, Accounting for PS strata <sup>(1)</sup> |                   |
|--------------------------------------------|----------------------------|-----------------|-----------------------------------------------------------------------|-------------------|
|                                            | TCA                        | Unexposed       | TCA                                                                   | Unexposed         |
| N                                          | 5,954                      | 885,115         | 3,314                                                                 | 180,562           |
| Age, mean (SD)                             | 26.68 (6.29)               | 23.85 (5.75)    | 26.95 (6.25)                                                          | 26.53 (85.51)     |
| Year of delivery, N (%)                    |                            |                 |                                                                       |                   |
| 2000-2002                                  | 1,292 (21.70)              | 187,511 (21.19) | 575 (17.35)                                                           | 31,159 (17.26)    |
| 2003-2005                                  | 3,012 (50.59)              | 426,522 (48.19) | 1,711 (51.63)                                                         | 92,942 (51.47)    |
| 2006-2007                                  | 1,650 (27.71)              | 271,082 (30.63) | 1,028 (31.02)                                                         | 56,461 (31.27)    |
| Race, N (%)                                |                            |                 |                                                                       |                   |
| White                                      | 3,746 (62.92)              | 339,144 (38.32) | 2,328 (70.25)                                                         | 126,497 (70.06)   |
| Black                                      | 1,105 (18.56)              | 313,369 (35.40) | 464 (14.00)                                                           | 25,725 (14.25)    |
| Hispanic                                   | 697 (11.71)                | 164,317 (18.56) | 308 (9.29)                                                            | 16,979 (9.40)     |
| Other or unknown                           | 406 (6.82)                 | 68,285 (7.71)   | 214 (6.46)                                                            | 11,361 (6.29)     |
| Multipara, N (%)                           | 4,883 (82.01)              | 706,656 (79.84) | 2,644 (79.78)                                                         | 143,805 (79.64)   |
| Multiple gestation, N (%)                  | 247 (4.15)                 | 31,258 (3.53)   | 148 (4.47)                                                            | 7,964 (4.41)      |
| Preterm birth, N (%) <sup>(2)</sup>        | 825 (13.86)                | 98,886 (11.17)  | 512 (15.45)                                                           | 27,928 (15.47)    |
| Antidepressant indications, N (%)          |                            |                 |                                                                       |                   |
| Depression                                 | 3,328 (55.90)              | 180,564 (20.40) | 3,314 (100.00%)                                                       | 180,562 (100.00%) |
| Other mental health disorders              | 591 (9.93)                 | 17,325 (1.96)   | 395 (11.92)                                                           | 21,287 (11.79)    |
| Pain related diagnoses                     | 1,787 (30.01)              | 24,527 (2.77)   | 1,012 (30.54)                                                         | 54,289 (30.07)    |
| Sleep disorders                            | 340 (5.71)                 | 3,319 (0.38)    | 231 (6.97)                                                            | 12,013 (6.65)     |
| Premenstrual tension syndrome              | 9 (0.15)                   | 453 (0.05)      | 3 (0.09)                                                              | 178 (0.10)        |
| Smoking                                    | 343 (5.76)                 | 17,769 (2.01)   | 236 (7.12)                                                            | 12,424 (6.88)     |
| Chronic fatigue syndrome                   | 458 (7.69)                 | 20,623 (2.33)   | 282 (8.51)                                                            | 15,674 (8.68)     |
| Proxies for depression severity, mean (SD) |                            |                 |                                                                       |                   |
| Number of outpatient depression diagnoses  | 1.58 (4.89)                | 0.24 (2.04)     | 2.80 (6.27)                                                           | 2.67 (21.82)      |

| Characteristic                                                              | Overall cohort, unadjusted |                 | Depression restricted cohort, Accounting for PS strata <sup>(1)</sup> |                |
|-----------------------------------------------------------------------------|----------------------------|-----------------|-----------------------------------------------------------------------|----------------|
|                                                                             | TCA                        | Unexposed       | TCA                                                                   | Unexposed      |
| Number of inpatient depression diagnoses                                    | 0.03 (0.22)                | 0.00 (0.06)     | 0.05 (0.29)                                                           | 0.05 (1.24)    |
| Chronic maternal illness, N (%)                                             |                            |                 |                                                                       |                |
| Hypertension                                                                | 346 (5.81)                 | 12,573 (1.42)   | 205 (6.19)                                                            | 10,743 (5.95)  |
| Diabetes                                                                    | 273 (4.59)                 | 10,628 (1.20)   | 157 (4.74)                                                            | 8,395 (4.65)   |
| Gestational diabetes                                                        | 62 (1.04)                  | 5,483 (0.62)    | 38 (1.15)                                                             | 2,115 (1.17)   |
| Epilepsy                                                                    | 69 (1.16)                  | 2,388 (0.27)    | 46 (1.39)                                                             | 2,450 (1.36)   |
| Renal disease                                                               | 25 (0.42)                  | 819 (0.09)      | 19 (0.57)                                                             | 867 (0.48)     |
| Other psychotropic medications, N (%)                                       |                            |                 |                                                                       |                |
| Anticonvulsants                                                             | 1,297 (21.78)              | 31,681 (3.58)   | 926 (27.94)                                                           | 48,207 (26.70) |
| Antipsychotics                                                              | 1,169 (19.63)              | 48,657 (5.50)   | 891 (26.89)                                                           | 48,026 (26.60) |
| Anxiolytics                                                                 | 379 (6.37)                 | 8,189 (0.93)    | 337 (10.17)                                                           | 17,636 (9.77)  |
| Benzodiazepines                                                             | 1,911 (32.10)              | 49,063 (5.54)   | 1,473 (44.45)                                                         | 79,140 (43.83) |
| Other hypnotics                                                             | 1,919 (32.23)              | 115,608 (13.06) | 1,340 (40.43)                                                         | 72,374 (40.08) |
| Barbiturates                                                                | 1,059 (17.79)              | 26,030 (2.94)   | 617 (18.62)                                                           | 32,907 (18.23) |
| Other medications, N (%)                                                    |                            |                 |                                                                       |                |
| Antidiabetics                                                               | 321 (5.39)                 | 15,364 (1.74)   | 185 (5.58)                                                            | 10,027 (5.55)  |
| Antihypertensives                                                           | 1,470 (24.69)              | 54,170 (6.12)   | 920 (27.76)                                                           | 49,374 (27.34) |
| Suspected teratogenics                                                      | 614 (10.31)                | 26,967 (3.05)   | 373 (11.26)                                                           | 19,629 (10.87) |
| Number of distinct prescription drugs, excluding antidepressants, mean (SD) | 4.66 (3.88)                | 1.45 (2.10)     | 5.17 (4.13)                                                           | 4.61 (23.94)   |

<sup>(1)</sup> To account for PS, the untreated observations were weighted using the distribution of the treated among PS strata

<sup>(2)</sup> Relates to current pregnancy

**Table S7 Cohort characteristics for SNRIs; overall unadjusted and depression restricted adjusted. Medicaid Analytic eXtract, 2000-2007.**

| Characteristic                             | Overall cohort, unadjusted |                 | Depression restricted cohort, Accounting for PS strata <sup>(1)</sup> |                   |
|--------------------------------------------|----------------------------|-----------------|-----------------------------------------------------------------------|-------------------|
|                                            | SNRI                       | Unexposed       | SNRI                                                                  | Unexposed         |
| N                                          | 6,904                      | 885,115         | 6,010                                                                 | 180,564           |
| Age, mean (SD)                             | 26.30 (5.70)               | 23.85 (5.75)    | 26.26 (5.69)                                                          | 25.87 (87.94)     |
| Year of delivery, N (%)                    |                            |                 |                                                                       |                   |
| 2000-2002                                  | 833 (12.07)                | 187,511 (21.19) | 683 (11.36)                                                           | 20,982 (11.62)    |
| 2003-2005                                  | 3,686 (53.39)              | 426,522 (48.19) | 3,170 (52.75)                                                         | 95,203 (52.73)    |
| 2006-2007                                  | 2,385 (34.55)              | 271,082 (30.63) | 2,157 (35.89)                                                         | 64,380 (35.65)    |
| Race, N (%)                                |                            |                 |                                                                       |                   |
| White                                      | 5,592 (81.00)              | 339,144 (38.32) | 4,903 (81.58)                                                         | 147,859 (81.89)   |
| Black                                      | 539 (7.81)                 | 313,369 (35.40) | 449 (7.47)                                                            | 13,803 (7.64)     |
| Hispanic                                   | 431 (6.24)                 | 164,317 (18.56) | 357 (5.94)                                                            | 10,404 (5.76)     |
| Other or unknown                           | 342 (4.95)                 | 68,285 (7.71)   | 301 (5.01)                                                            | 8,497 (4.71)      |
| Multipara, N (%)                           | 5,675 (82.20)              | 706,656 (79.84) | 4,905 (81.61)                                                         | 147,525 (81.70)   |
| Multiple gestation, N (%)                  | 268 (3.88)                 | 31,258 (3.53)   | 228 (3.79)                                                            | 6,919 (3.83)      |
| Preterm birth, N (%) <sup>(2)</sup>        | 1,004 (14.54)              | 98,886 (11.17)  | 885 (14.73)                                                           | 26,437 (14.64)    |
| Antidepressant indications, N (%)          |                            |                 |                                                                       |                   |
| Depression                                 | 6,014 (87.11)              | 180,564 (20.40) | 6,010 (100.00%)                                                       | 180,564 (100.00%) |
| Other mental health disorders              | 747 (10.82)                | 17,325 (1.96)   | 693 (11.53)                                                           | 20,277 (11.23)    |
| Pain related diagnoses                     | 906 (13.12)                | 24,527 (2.77)   | 802 (13.34)                                                           | 23,041 (12.76)    |
| Sleep disorders                            | 288 (4.17)                 | 3,319 (0.38)    | 249 (4.14)                                                            | 7,500 (4.15)      |
| Premenstrual tension syndrome              | 15 (0.22)                  | 453 (0.05)      | 13 (0.22)                                                             | 342 (0.19)        |
| Smoking                                    | 441 (6.39)                 | 17,769 (2.01)   | 417 (6.94)                                                            | 12,388 (6.86)     |
| Chronic fatigue syndrome                   | 680 (9.85)                 | 20,623 (2.33)   | 577 (9.60)                                                            | 17,132 (9.49)     |
| Proxies for depression severity, mean (SD) |                            |                 |                                                                       |                   |
| Number of outpatient depression diagnoses  | 3.51 (7.15)                | 0.24 (2.04)     | 4.02 (7.51)                                                           | 3.83 (37.97)      |

| Characteristic                                                              | Overall cohort, unadjusted |                 | Depression restricted cohort, Accounting for PS strata <sup>(1)</sup> |                |
|-----------------------------------------------------------------------------|----------------------------|-----------------|-----------------------------------------------------------------------|----------------|
|                                                                             | SNRI                       | Unexposed       | SNRI                                                                  | Unexposed      |
| Number of inpatient depression diagnoses                                    | 0.06 (0.30)                | 0.00 (0.06)     | 0.07 (0.32)                                                           | 0.06 (1.40)    |
| Chronic maternal illness, N (%)                                             |                            |                 |                                                                       |                |
| Hypertension                                                                | 261 (3.78)                 | 12,573 (1.42)   | 232 (3.86)                                                            | 7,047 (3.90)   |
| Diabetes                                                                    | 212 (3.07)                 | 10,628 (1.20)   | 183 (3.04)                                                            | 5,430 (3.01)   |
| Gestational diabetes                                                        | 86 (1.25)                  | 5,483 (0.62)    | 76 (1.26)                                                             | 2,251 (1.25)   |
| Epilepsy                                                                    | 59 (0.85)                  | 2,388 (0.27)    | 52 (0.87)                                                             | 1,606 (0.89)   |
| Renal disease                                                               | 14 (0.20)                  | 819 (0.09)      | 14 (0.23)                                                             | 404 (0.22)     |
| Other psychotropic medications, N (%)                                       |                            |                 |                                                                       |                |
| Anticonvulsants                                                             | 1,698 (24.59)              | 31,681 (3.58)   | 1,591 (26.47)                                                         | 47,539 (26.33) |
| Antipsychotics                                                              | 1,959 (28.37)              | 48,657 (5.50)   | 1,865 (31.03)                                                         | 55,912 (30.97) |
| Anxiolytics                                                                 | 648 (9.39)                 | 8,189 (0.93)    | 609 (10.13)                                                           | 18,426 (10.20) |
| Benzodiazepines                                                             | 2,869 (41.56)              | 49,063 (5.54)   | 2,638 (43.89)                                                         | 77,104 (42.70) |
| Other hypnotics                                                             | 2,464 (35.69)              | 115,608 (13.06) | 2,258 (37.57)                                                         | 67,338 (37.29) |
| Barbiturates                                                                | 705 (10.21)                | 26,030 (2.94)   | 622 (10.35)                                                           | 18,933 (10.49) |
| Other medications, N (%)                                                    |                            |                 |                                                                       |                |
| Antidiabetics                                                               | 313 (4.53)                 | 15,364 (1.74)   | 272 (4.53)                                                            | 7,968 (4.41)   |
| Antihypertensives                                                           | 1,242 (17.99)              | 54,170 (6.12)   | 1,090 (18.14)                                                         | 32,799 (18.16) |
| Suspected teratogenics                                                      | 670 (9.70)                 | 26,967 (3.05)   | 577 (9.60)                                                            | 17,581 (9.74)  |
| Number of distinct prescription drugs, excluding antidepressants, mean (SD) | 4.06 (3.62)                | 1.45 (2.10)     | 4.13 (3.66)                                                           | 3.95 (22.06)   |

<sup>(1)</sup> To account for PS, the untreated observations were weighted using the distribution of the treated among PS strata

<sup>(2)</sup> Relates to current pregnancy

**Table S8 Cohort characteristics for other antidepressants; overall unadjusted and depression restricted adjusted. Medicaid Analytic eXtract, 2000-2007.**

| Characteristic                             | Overall cohort, unadjusted |                 | Depression restricted cohort, Accounting for PS strata <sup>(1)</sup> |                   |
|--------------------------------------------|----------------------------|-----------------|-----------------------------------------------------------------------|-------------------|
|                                            | Other                      | Unexposed       | Other                                                                 | Unexposed         |
| N                                          | 7,055                      | 885,115         | 6,021                                                                 | 180,564           |
| Age, mean (SD)                             | 26.40 (6.45)               | 23.85 (5.75)    | 26.26 (6.43)                                                          | 25.90 (94.62)     |
| Year of delivery, N (%)                    |                            |                 |                                                                       |                   |
| 2000-2002                                  | 1,454 (20.61)              | 187,511 (21.19) | 1,127 (18.72)                                                         | 33,638 (18.63)    |
| 2003-2005                                  | 3,541 (50.19)              | 426,522 (48.19) | 3,038 (50.46)                                                         | 90,360 (50.04)    |
| 2006-2007                                  | 2,060 (29.20)              | 271,082 (30.63) | 1,856 (30.83)                                                         | 56,566 (31.33)    |
| Race, N (%)                                |                            |                 |                                                                       |                   |
| White                                      | 4,894 (69.37)              | 339,144 (38.32) | 4,246 (70.52)                                                         | 127,199 (70.45)   |
| Black                                      | 1,134 (16.07)              | 313,369 (35.40) | 904 (15.01)                                                           | 27,378 (15.16)    |
| Hispanic                                   | 565 (8.01)                 | 164,317 (18.56) | 467 (7.76)                                                            | 13,633 (7.55)     |
| Other or unknown                           | 462 (6.55)                 | 68,285 (7.71)   | 404 (6.71)                                                            | 12,355 (6.84)     |
| Multipara, N (%)                           | 5,274 (74.76)              | 706,656 (79.84) | 4,436 (73.68)                                                         | 132,568 (73.42)   |
| Multiple gestation, N (%)                  | 297 (4.21)                 | 31,258 (3.53)   | 253 (4.20)                                                            | 7,434 (4.12)      |
| Preterm birth, N (%) <sup>(2)</sup>        | 1,141 (16.17)              | 98,886 (11.17)  | 964 (16.01)                                                           | 27,053 (14.98)    |
| Antidepressant indications, N (%)          |                            |                 |                                                                       |                   |
| Depression                                 | 6,039 (85.60)              | 180,564 (20.40) | 6,021 (100.00%)                                                       | 180,564 (100.00%) |
| Other mental health disorders              | 1,070 (15.17)              | 17,325 (1.96)   | 966 (16.04)                                                           | 29,121 (16.13)    |
| Pain related diagnoses                     | 844 (11.96)                | 24,527 (2.77)   | 731 (12.14)                                                           | 21,751 (12.05)    |
| Sleep disorders                            | 510 (7.23)                 | 3,319 (0.38)    | 408 (6.78)                                                            | 12,872 (7.13)     |
| Premenstrual tension syndrome              | 9 (0.13)                   | 453 (0.05)      | 7 (0.12)                                                              | 238 (0.13)        |
| Smoking                                    | 490 (6.95)                 | 17,769 (2.01)   | 440 (7.31)                                                            | 13,321 (7.38)     |
| Chronic fatigue syndrome                   | 485 (6.87)                 | 20,623 (2.33)   | 411 (6.83)                                                            | 12,348 (6.84)     |
| Proxies for depression severity, mean (SD) |                            |                 |                                                                       |                   |
| Number of outpatient depression diagnoses  | 4.57 (8.72)                | 0.24 (2.04)     | 5.30 (9.14)                                                           | 5.13 (42.62)      |

| Characteristic                                                              | Overall cohort, unadjusted |                 | Depression restricted cohort, Accounting for PS strata <sup>(1)</sup> |                |
|-----------------------------------------------------------------------------|----------------------------|-----------------|-----------------------------------------------------------------------|----------------|
|                                                                             | Other                      | Unexposed       | Other                                                                 | Unexposed      |
| Number of inpatient depression diagnoses                                    | 0.09 (0.36)                | 0.00 (0.06)     | 0.10 (0.38)                                                           | 0.09 (1.99)    |
| Chronic maternal illness, N (%)                                             |                            |                 |                                                                       |                |
| Hypertension                                                                | 305 (4.32)                 | 12,573 (1.42)   | 262 (4.35)                                                            | 7,715 (4.27)   |
| Diabetes                                                                    | 210 (2.98)                 | 10,628 (1.20)   | 176 (2.92)                                                            | 5,461 (3.02)   |
| Gestational diabetes                                                        | 82 (1.16)                  | 5,483 (0.62)    | 71 (1.18)                                                             | 2,070 (1.15)   |
| Epilepsy                                                                    | 72 (1.02)                  | 2,388 (0.27)    | 65 (1.08)                                                             | 2,038 (1.13)   |
| Renal disease                                                               | 13 (0.18)                  | 819 (0.09)      | 12 (0.20)                                                             | 277 (0.15)     |
| Other psychotropic medications, N (%)                                       |                            |                 |                                                                       |                |
| Anticonvulsants                                                             | 1,981 (28.08)              | 31,681 (3.58)   | 1,821 (30.24)                                                         | 53,981 (29.90) |
| Antipsychotics                                                              | 2,281 (32.33)              | 48,657 (5.50)   | 2,095 (34.79)                                                         | 62,963 (34.87) |
| Anxiolytics                                                                 | 705 (9.99)                 | 8,189 (0.93)    | 645 (10.71)                                                           | 19,653 (10.88) |
| Benzodiazepines                                                             | 2,827 (40.07)              | 49,063 (5.54)   | 2,572 (42.72)                                                         | 76,068 (42.13) |
| Other hypnotics                                                             | 2,712 (38.44)              | 115,608 (13.06) | 2,440 (40.52)                                                         | 70,953 (39.30) |
| Barbiturates                                                                | 718 (10.18)                | 26,030 (2.94)   | 616 (10.23)                                                           | 18,677 (10.34) |
| Other medications, N (%)                                                    |                            |                 |                                                                       |                |
| Antidiabetics                                                               | 263 (3.73)                 | 15,364 (1.74)   | 219 (3.64)                                                            | 6,702 (3.71)   |
| Antihypertensives                                                           | 1,306 (18.51)              | 54,170 (6.12)   | 1,127 (18.72)                                                         | 33,226 (18.40) |
| Suspected teratogenics                                                      | 676 (9.58)                 | 26,967 (3.05)   | 575 (9.55)                                                            | 17,475 (9.68)  |
| Number of distinct prescription drugs, excluding antidepressants, mean (SD) | 4.23 (3.80)                | 1.45 (2.10)     | 4.28 (3.80)                                                           | 4.02 (23.99)   |

<sup>(1)</sup> To account for PS, the untreated observations were weighted using the distribution of the treated among PS strata

<sup>(2)</sup> Relates to current pregnancy



**Table S9 Cohort characteristics for bupropion; overall unadjusted and depression restricted adjusted. Medicaid Analytic eXtract, 2000-2007.**

| Characteristic                             | Overall cohort, unadjusted |                 | Depression restricted cohort, Accounting for PS strata <sup>(1)</sup> |                   |
|--------------------------------------------|----------------------------|-----------------|-----------------------------------------------------------------------|-------------------|
|                                            | Bupropion                  | Unexposed       | Bupropion                                                             | Unexposed         |
| N                                          | 8,856                      | 885,115         | 6,691                                                                 | 180,563           |
| Age, mean (SD)                             | 26.02 (5.89)               | 23.85 (5.75)    | 26.02 (5.93)                                                          | 25.71 (67.21)     |
| Year of delivery, N (%)                    |                            |                 |                                                                       |                   |
| 2000-2002                                  | 1,273 (14.37)              | 187,511 (21.19) | 802 (11.99)                                                           | 21,948 (12.16)    |
| 2003-2005                                  | 4,564 (51.54)              | 426,522 (48.19) | 3,372 (50.40)                                                         | 90,761 (50.27)    |
| 2006-2007                                  | 3,019 (34.09)              | 271,082 (30.63) | 2,517 (37.62)                                                         | 67,854 (37.58)    |
| Race, N (%)                                |                            |                 |                                                                       |                   |
| White                                      | 6,932 (78.27)              | 339,144 (38.32) | 5,267 (78.72)                                                         | 142,667 (79.01)   |
| Black                                      | 857 (9.68)                 | 313,369 (35.40) | 589 (8.80)                                                            | 16,047 (8.89)     |
| Hispanic                                   | 624 (7.05)                 | 164,317 (18.56) | 488 (7.29)                                                            | 12,544 (6.95)     |
| Other or unknown                           | 443 (5.00)                 | 68,285 (7.71)   | 347 (5.19)                                                            | 9,305 (5.15)      |
| Multipara, N (%)                           | 7,228 (81.62)              | 706,656 (79.84) | 5,360 (80.11)                                                         | 144,399 (79.97)   |
| Multiple gestation, N (%)                  | 327 (3.69)                 | 31,258 (3.53)   | 257 (3.84)                                                            | 6,995 (3.87)      |
| Preterm birth, N (%) <sup>(2)</sup>        | 1,205 (13.61)              | 98,886 (11.17)  | 934 (13.96)                                                           | 26,440 (14.64)    |
| Antidepressant indications, N (%)          |                            |                 |                                                                       |                   |
| Depression                                 | 6,704 (75.70)              | 180,564 (20.40) | 6,691 (100.00%)                                                       | 180,563 (100.00%) |
| Other mental health disorders              | 931 (10.51)                | 17,325 (1.96)   | 804 (12.02)                                                           | 21,992 (12.18)    |
| Pain related diagnoses                     | 817 (9.23)                 | 24,527 (2.77)   | 681 (10.18)                                                           | 18,129 (10.04)    |
| Sleep disorders                            | 283 (3.20)                 | 3,319 (0.38)    | 235 (3.51)                                                            | 6,521 (3.61)      |
| Premenstrual tension syndrome              | 24 (0.27)                  | 453 (0.05)      | 18 (0.27)                                                             | 520 (0.29)        |
| Smoking                                    | 885 (9.99)                 | 17,769 (2.01)   | 625 (9.34)                                                            | 16,896 (9.36)     |
| Chronic fatigue syndrome                   | 733 (8.28)                 | 20,623 (2.33)   | 576 (8.61)                                                            | 15,736 (8.71)     |
| Proxies for depression severity, mean (SD) |                            |                 |                                                                       |                   |
| Number of outpatient depression diagnoses  | 2.85 (6.59)                | 0.24 (2.04)     | 3.75 (7.34)                                                           | 3.62 (28.30)      |

| Characteristic                                                              | Overall cohort, unadjusted |                 | Depression restricted cohort, Accounting for PS strata <sup>(1)</sup> |                |
|-----------------------------------------------------------------------------|----------------------------|-----------------|-----------------------------------------------------------------------|----------------|
|                                                                             | Bupropion                  | Unexposed       | Bupropion                                                             | Unexposed      |
| Number of inpatient depression diagnoses                                    | 0.04 (0.24)                | 0.00 (0.06)     | 0.06 (0.27)                                                           | 0.05 (1.22)    |
| Chronic maternal illness, N (%)                                             |                            |                 |                                                                       |                |
| Hypertension                                                                | 354 (4.00)                 | 12,573 (1.42)   | 263 (3.93)                                                            | 6,853 (3.80)   |
| Diabetes                                                                    | 261 (2.95)                 | 10,628 (1.20)   | 191 (2.85)                                                            | 5,090 (2.82)   |
| Gestational diabetes                                                        | 104 (1.17)                 | 5,483 (0.62)    | 79 (1.18)                                                             | 2,002 (1.11)   |
| Epilepsy                                                                    | 26 (0.29)                  | 2,388 (0.27)    | 22 (0.33)                                                             | 628 (0.35)     |
| Renal disease                                                               | 15 (0.17)                  | 819 (0.09)      | 13 (0.19)                                                             | 343 (0.19)     |
| Other psychotropic medications, N (%)                                       |                            |                 |                                                                       |                |
| Anticonvulsants                                                             | 1,750 (19.76)              | 31,681 (3.58)   | 1,579 (23.60)                                                         | 42,823 (23.72) |
| Antipsychotics                                                              | 2,092 (23.62)              | 48,657 (5.50)   | 1,892 (28.28)                                                         | 51,526 (28.54) |
| Anxiolytics                                                                 | 589 (6.65)                 | 8,189 (0.93)    | 518 (7.74)                                                            | 14,028 (7.77)  |
| Benzodiazepines                                                             | 2,663 (30.07)              | 49,063 (5.54)   | 2,356 (35.21)                                                         | 62,641 (34.69) |
| Other hypnotics                                                             | 2,690 (30.37)              | 115,608 (13.06) | 2,318 (34.64)                                                         | 62,600 (34.67) |
| Barbiturates                                                                | 774 (8.74)                 | 26,030 (2.94)   | 653 (9.76)                                                            | 17,403 (9.64)  |
| Other medications, N (%)                                                    |                            |                 |                                                                       |                |
| Antidiabetics                                                               | 379 (4.28)                 | 15,364 (1.74)   | 293 (4.38)                                                            | 7,799 (4.32)   |
| Antihypertensives                                                           | 1,389 (15.68)              | 54,170 (6.12)   | 1,114 (16.65)                                                         | 29,878 (16.55) |
| Suspected teratogenics                                                      | 768 (8.67)                 | 26,967 (3.05)   | 590 (8.82)                                                            | 16,000 (8.86)  |
| Number of distinct prescription drugs, excluding antidepressants, mean (SD) | 3.69 (3.48)                | 1.45 (2.10)     | 3.88 (3.54)                                                           | 3.66 (16.31)   |

<sup>(1)</sup> To account for PS, the untreated observations were weighted using the distribution of the treated among PS strata

<sup>(2)</sup> Relates to current pregnancy

**Table S10 Cohort characteristics for paroxetine; overall unadjusted and depression restricted adjusted. Medicaid Analytic eXtract, 2000-2007.**

| Characteristic                             | Overall cohort, unadjusted |                 | Depression restricted cohort, Accounting for PS strata <sup>(1)</sup> |                   |
|--------------------------------------------|----------------------------|-----------------|-----------------------------------------------------------------------|-------------------|
|                                            | Paroxetine                 | Unexposed       | Paroxetine                                                            | Unexposed         |
| N                                          | 11,126                     | 885,115         | 8,748                                                                 | 180,564           |
| Age, mean (SD)                             | 26.04 (5.93)               | 23.85 (5.75)    | 26.02 (5.95)                                                          | 25.72 (57.84)     |
| Year of delivery, N (%)                    |                            |                 |                                                                       |                   |
| 2000-2002                                  | 2,588 (23.26)              | 187,511 (21.19) | 1,859 (21.25)                                                         | 38,514 (21.33)    |
| 2003-2005                                  | 6,307 (56.69)              | 426,522 (48.19) | 4,992 (57.06)                                                         | 103,230 (57.17)   |
| 2006-2007                                  | 2,231 (20.05)              | 271,082 (30.63) | 1,897 (21.69)                                                         | 38,820 (21.50)    |
| Race, N (%)                                |                            |                 |                                                                       |                   |
| White                                      | 7,935 (71.32)              | 339,144 (38.32) | 6,282 (71.81)                                                         | 130,651 (72.36)   |
| Black                                      | 1,351 (12.14)              | 313,369 (35.40) | 1,013 (11.58)                                                         | 20,365 (11.28)    |
| Hispanic                                   | 1,236 (11.11)              | 164,317 (18.56) | 962 (11.00)                                                           | 19,551 (10.83)    |
| Other or unknown                           | 604 (5.43)                 | 68,285 (7.71)   | 491 (5.61)                                                            | 9,997 (5.54)      |
| Multipara, N (%)                           | 9,145 (82.19)              | 706,656 (79.84) | 7,099 (81.15)                                                         | 146,650 (81.22)   |
| Multiple gestation, N (%)                  | 470 (4.22)                 | 31,258 (3.53)   | 362 (4.14)                                                            | 7,432 (4.12)      |
| Preterm birth, N (%) <sup>(2)</sup>        | 1,543 (13.87)              | 98,886 (11.17)  | 1,227 (14.03)                                                         | 24,924 (13.80)    |
| Antidepressant indications, N (%)          |                            |                 |                                                                       |                   |
| Depression                                 | 8,763 (78.76)              | 180,564 (20.40) | 8,748 (100.00%)                                                       | 180,564 (100.00%) |
| Other mental health disorders              | 955 (8.58)                 | 17,325 (1.96)   | 816 (9.33)                                                            | 16,736 (9.27)     |
| Pain related diagnoses                     | 1,080 (9.71)               | 24,527 (2.77)   | 871 (9.96)                                                            | 18,043 (9.99)     |
| Sleep disorders                            | 356 (3.20)                 | 3,319 (0.38)    | 280 (3.20)                                                            | 5,712 (3.16)      |
| Premenstrual tension syndrome              | 29 (0.26)                  | 453 (0.05)      | 18 (0.21)                                                             | 377 (0.21)        |
| Smoking                                    | 536 (4.82)                 | 17,769 (2.01)   | 465 (5.32)                                                            | 9,664 (5.35)      |
| Chronic fatigue syndrome                   | 863 (7.76)                 | 20,623 (2.33)   | 703 (8.04)                                                            | 14,471 (8.01)     |
| Proxies for depression severity, mean (SD) |                            |                 |                                                                       |                   |
| Number of outpatient depression diagnoses  | 2.47 (5.91)                | 0.24 (2.04)     | 3.13 (6.49)                                                           | 3.04 (18.19)      |

| Characteristic                                                              | Overall cohort, unadjusted |                 | Depression restricted cohort, Accounting for PS strata <sup>(1)</sup> |                |
|-----------------------------------------------------------------------------|----------------------------|-----------------|-----------------------------------------------------------------------|----------------|
|                                                                             | Paroxetine                 | Unexposed       | Paroxetine                                                            | Unexposed      |
| Number of inpatient depression diagnoses                                    | 0.04 (0.23)                | 0.00 (0.06)     | 0.05 (0.26)                                                           | 0.05 (0.81)    |
| Chronic maternal illness, N (%)                                             |                            |                 |                                                                       |                |
| Hypertension                                                                | 436 (3.92)                 | 12,573 (1.42)   | 360 (4.12)                                                            | 7,326 (4.06)   |
| Diabetes                                                                    | 322 (2.89)                 | 10,628 (1.20)   | 232 (2.65)                                                            | 4,840 (2.68)   |
| Gestational diabetes                                                        | 122 (1.10)                 | 5,483 (0.62)    | 97 (1.11)                                                             | 1,937 (1.07)   |
| Epilepsy                                                                    | 95 (0.85)                  | 2,388 (0.27)    | 72 (0.82)                                                             | 1,503 (0.83)   |
| Renal disease                                                               | 18 (0.16)                  | 819 (0.09)      | 13 (0.15)                                                             | 263 (0.15)     |
| Other psychotropic medications, N (%)                                       |                            |                 |                                                                       |                |
| Anticonvulsants                                                             | 1,533 (13.78)              | 31,681 (3.58)   | 1,348 (15.41)                                                         | 28,228 (15.63) |
| Antipsychotics                                                              | 2,010 (18.07)              | 48,657 (5.50)   | 1,777 (20.31)                                                         | 36,954 (20.47) |
| Anxiolytics                                                                 | 827 (7.43)                 | 8,189 (0.93)    | 739 (8.45)                                                            | 15,097 (8.36)  |
| Benzodiazepines                                                             | 3,940 (35.41)              | 49,063 (5.54)   | 3,417 (39.06)                                                         | 68,755 (38.08) |
| Other hypnotics                                                             | 3,116 (28.01)              | 115,608 (13.06) | 2,645 (30.24)                                                         | 54,295 (30.07) |
| Barbiturates                                                                | 914 (8.22)                 | 26,030 (2.94)   | 741 (8.47)                                                            | 15,265 (8.45)  |
| Other medications, N (%)                                                    |                            |                 |                                                                       |                |
| Antidiabetics                                                               | 379 (3.41)                 | 15,364 (1.74)   | 286 (3.27)                                                            | 5,971 (3.31)   |
| Antihypertensives                                                           | 1,695 (15.23)              | 54,170 (6.12)   | 1,355 (15.49)                                                         | 27,895 (15.45) |
| Suspected teratogenics                                                      | 813 (7.31)                 | 26,967 (3.05)   | 623 (7.12)                                                            | 13,274 (7.35)  |
| Number of distinct prescription drugs, excluding antidepressants, mean (SD) | 3.51 (3.37)                | 1.45 (2.10)     | 3.58 (3.43)                                                           | 3.45 (12.94)   |

<sup>(1)</sup> To account for PS, the untreated observations were weighted using the distribution of the treated among PS strata

<sup>(2)</sup> Relates to current pregnancy

**Table S11 Cohort characteristics for sertraline; overall unadjusted and depression restricted adjusted. Medicaid Analytic eXtract, 2000-2007.**

| Characteristic                             | Overall cohort, unadjusted |                 | Depression restricted cohort, Accounting for PS strata <sup>(1)</sup> |                   |
|--------------------------------------------|----------------------------|-----------------|-----------------------------------------------------------------------|-------------------|
|                                            | Sertraline                 | Unexposed       | Sertraline                                                            | Unexposed         |
| N                                          | 14,040                     | 885,115         | 11,056                                                                | 180,564           |
| Age, mean (SD)                             | 25.33 (5.90)               | 23.85 (5.75)    | 25.29 (5.93)                                                          | 25.12 (51.80)     |
| Year of delivery, N (%)                    |                            |                 |                                                                       |                   |
| 2000-2002                                  | 2,329 (16.59)              | 187,511 (21.19) | 1,679 (15.19)                                                         | 27,936 (15.47)    |
| 2003-2005                                  | 7,611 (54.21)              | 426,522 (48.19) | 5,911 (53.46)                                                         | 96,405 (53.39)    |
| 2006-2007                                  | 4,100 (29.20)              | 271,082 (30.63) | 3,466 (31.35)                                                         | 56,223 (31.14)    |
| Race, N (%)                                |                            |                 |                                                                       |                   |
| White                                      | 10,359 (73.78)             | 339,144 (38.32) | 8,169 (73.89)                                                         | 135,160 (74.85)   |
| Black                                      | 1,715 (12.22)              | 313,369 (35.40) | 1,304 (11.79)                                                         | 20,367 (11.28)    |
| Hispanic                                   | 1,223 (8.71)               | 164,317 (18.56) | 967 (8.75)                                                            | 15,123 (8.38)     |
| Other or unknown                           | 743 (5.29)                 | 68,285 (7.71)   | 616 (5.57)                                                            | 9,914 (5.49)      |
| Multipara, N (%)                           | 11,131 (79.28)             | 706,656 (79.84) | 8,605 (77.83)                                                         | 141,034 (78.11)   |
| Multiple gestation, N (%)                  | 515 (3.67)                 | 31,258 (3.53)   | 386 (3.49)                                                            | 6,334 (3.51)      |
| Preterm birth, N (%) <sup>(2)</sup>        | 1,988 (14.16)              | 98,886 (11.17)  | 1,593 (14.41)                                                         | 25,143 (13.92)    |
| Antidepressant indications, N (%)          |                            |                 |                                                                       |                   |
| Depression                                 | 11,074 (78.87)             | 180,564 (20.40) | 11,056 (100.00%)                                                      | 180,564 (100.00%) |
| Other mental health disorders              | 1,296 (9.23)               | 17,325 (1.96)   | 1,150 (10.40)                                                         | 18,634 (10.32)    |
| Pain related diagnoses                     | 1,261 (8.98)               | 24,527 (2.77)   | 1,058 (9.57)                                                          | 17,330 (9.60)     |
| Sleep disorders                            | 453 (3.23)                 | 3,319 (0.38)    | 381 (3.45)                                                            | 6,015 (3.33)      |
| Premenstrual tension syndrome              | 46 (0.33)                  | 453 (0.05)      | 26 (0.24)                                                             | 440 (0.24)        |
| Smoking                                    | 765 (5.45)                 | 17,769 (2.01)   | 654 (5.92)                                                            | 10,736 (5.95)     |
| Chronic fatigue syndrome                   | 1,087 (7.74)               | 20,623 (2.33)   | 876 (7.92)                                                            | 14,326 (7.93)     |
| Proxies for depression severity, mean (SD) |                            |                 |                                                                       |                   |
| Number of outpatient depression diagnoses  | 2.66 (6.08)                | 0.24 (2.04)     | 3.36 (6.65)                                                           | 3.31 (20.74)      |

| Characteristic                                                              | Overall cohort, unadjusted |                 | Depression restricted cohort, Accounting for PS strata <sup>(1)</sup> |                |
|-----------------------------------------------------------------------------|----------------------------|-----------------|-----------------------------------------------------------------------|----------------|
|                                                                             | Sertraline                 | Unexposed       | Sertraline                                                            | Unexposed      |
| Number of inpatient depression diagnoses                                    | 0.05 (0.25)                | 0.00 (0.06)     | 0.06 (0.28)                                                           | 0.05 (0.88)    |
| Chronic maternal illness, N (%)                                             |                            |                 |                                                                       |                |
| Hypertension                                                                | 481 (3.43)                 | 12,573 (1.42)   | 375 (3.39)                                                            | 6,179 (3.42)   |
| Diabetes                                                                    | 389 (2.77)                 | 10,628 (1.20)   | 310 (2.80)                                                            | 4,933 (2.73)   |
| Gestational diabetes                                                        | 143 (1.02)                 | 5,483 (0.62)    | 108 (0.98)                                                            | 1,742 (0.96)   |
| Epilepsy                                                                    | 123 (0.88)                 | 2,388 (0.27)    | 105 (0.95)                                                            | 1,778 (0.98)   |
| Renal disease                                                               | 26 (0.19)                  | 819 (0.09)      | 24 (0.22)                                                             | 352 (0.20)     |
| Other psychotropic medications, N (%)                                       |                            |                 |                                                                       |                |
| Anticonvulsants                                                             | 2,013 (14.34)              | 31,681 (3.58)   | 1,819 (16.45)                                                         | 29,932 (16.58) |
| Antipsychotics                                                              | 2,704 (19.26)              | 48,657 (5.50)   | 2,417 (21.86)                                                         | 39,871 (22.08) |
| Anxiolytics                                                                 | 895 (6.37)                 | 8,189 (0.93)    | 808 (7.31)                                                            | 13,383 (7.41)  |
| Benzodiazepines                                                             | 4,030 (28.70)              | 49,063 (5.54)   | 3,527 (31.90)                                                         | 57,111 (31.63) |
| Other hypnotics                                                             | 3,984 (28.38)              | 115,608 (13.06) | 3,424 (30.97)                                                         | 55,699 (30.85) |
| Barbiturates                                                                | 1,091 (7.77)               | 26,030 (2.94)   | 892 (8.07)                                                            | 14,657 (8.12)  |
| Other medications, N (%)                                                    |                            |                 |                                                                       |                |
| Antidiabetics                                                               | 499 (3.55)                 | 15,364 (1.74)   | 389 (3.52)                                                            | 6,214 (3.44)   |
| Antihypertensives                                                           | 1,982 (14.12)              | 54,170 (6.12)   | 1,615 (14.61)                                                         | 26,705 (14.79) |
| Suspected teratogenics                                                      | 1,101 (7.84)               | 26,967 (3.05)   | 874 (7.91)                                                            | 14,263 (7.90)  |
| Number of distinct prescription drugs, excluding antidepressants, mean (SD) | 3.39 (3.34)                | 1.45 (2.10)     | 3.48 (3.40)                                                           | 3.36 (12.26)   |

<sup>(1)</sup> To account for PS, the untreated observations were weighted using the distribution of the treated among PS strata

<sup>(2)</sup> Relates to current pregnancy

**Table S12 Cohort characteristics for fluoxetine; overall unadjusted and depression restricted adjusted. Medicaid Analytic eXtract, 2000-2007.**

| Characteristic                             | Overall cohort, unadjusted |                 | Depression restricted cohort, Accounting for PS strata <sup>(1)</sup> |                   |
|--------------------------------------------|----------------------------|-----------------|-----------------------------------------------------------------------|-------------------|
|                                            | Fluoxetine                 | Unexposed       | Fluoxetine                                                            | Unexposed         |
| N                                          | 11,048                     | 885,115         | 8,664                                                                 | 180,563           |
| Age, mean (SD)                             | 25.74 (6.06)               | 23.85 (5.75)    | 25.63 (6.08)                                                          | 25.36 (58.53)     |
| Year of delivery, N (%)                    |                            |                 |                                                                       |                   |
| 2000-2002                                  | 2,171 (19.65)              | 187,511 (21.19) | 1,519 (17.53)                                                         | 32,147 (17.80)    |
| 2003-2005                                  | 5,505 (49.83)              | 426,522 (48.19) | 4,305 (49.69)                                                         | 89,644 (49.65)    |
| 2006-2007                                  | 3,372 (30.52)              | 271,082 (30.63) | 2,840 (32.78)                                                         | 58,772 (32.55)    |
| Race, N (%)                                |                            |                 |                                                                       |                   |
| White                                      | 8,083 (73.16)              | 339,144 (38.32) | 6,332 (73.08)                                                         | 133,050 (73.69)   |
| Black                                      | 1,240 (11.22)              | 313,369 (35.40) | 979 (11.30)                                                           | 19,931 (11.04)    |
| Hispanic                                   | 1,070 (9.69)               | 164,317 (18.56) | 828 (9.56)                                                            | 16,691 (9.24)     |
| Other or unknown                           | 655 (5.93)                 | 68,285 (7.71)   | 525 (6.06)                                                            | 10,891 (6.03)     |
| Multipara, N (%)                           | 8,834 (79.96)              | 706,656 (79.84) | 6,791 (78.38)                                                         | 141,601 (78.42)   |
| Multiple gestation, N (%)                  | 421 (3.81)                 | 31,258 (3.53)   | 320 (3.69)                                                            | 6,592 (3.65)      |
| Preterm birth, N (%) <sup>(2)</sup>        | 1,513 (13.69)              | 98,886 (11.17)  | 1,205 (13.91)                                                         | 24,844 (13.76)    |
| Antidepressant indications, N (%)          |                            |                 |                                                                       |                   |
| Depression                                 | 8,680 (78.57)              | 180,564 (20.40) | 8,664 (100.00%)                                                       | 180,563 (100.00%) |
| Other mental health disorders              | 1,149 (10.40)              | 17,325 (1.96)   | 1,003 (11.58)                                                         | 20,741 (11.49)    |
| Pain related diagnoses                     | 1,052 (9.52)               | 24,527 (2.77)   | 846 (9.76)                                                            | 17,464 (9.67)     |
| Sleep disorders                            | 339 (3.07)                 | 3,319 (0.38)    | 286 (3.30)                                                            | 6,066 (3.36)      |
| Premenstrual tension syndrome              | 81 (0.73)                  | 453 (0.05)      | 44 (0.51)                                                             | 868 (0.48)        |
| Smoking                                    | 583 (5.28)                 | 17,769 (2.01)   | 509 (5.87)                                                            | 10,394 (5.76)     |
| Chronic fatigue syndrome                   | 861 (7.79)                 | 20,623 (2.33)   | 689 (7.95)                                                            | 14,561 (8.06)     |
| Proxies for depression severity, mean (SD) |                            |                 |                                                                       |                   |
| Number of outpatient depression diagnoses  | 2.78 (6.64)                | 0.24 (2.04)     | 3.52 (7.25)                                                           | 3.45 (24.58)      |

| Characteristic                                                              | Overall cohort, unadjusted |                 | Depression restricted cohort, Accounting for PS strata <sup>(1)</sup> |                |
|-----------------------------------------------------------------------------|----------------------------|-----------------|-----------------------------------------------------------------------|----------------|
|                                                                             | Fluoxetine                 | Unexposed       | Fluoxetine                                                            | Unexposed      |
| Number of inpatient depression diagnoses                                    | 0.06 (0.30)                | 0.00 (0.06)     | 0.07 (0.33)                                                           | 0.07 (1.57)    |
| Chronic maternal illness, N (%)                                             |                            |                 |                                                                       |                |
| Hypertension                                                                | 350 (3.17)                 | 12,573 (1.42)   | 264 (3.05)                                                            | 5,473 (3.03)   |
| Diabetes                                                                    | 285 (2.58)                 | 10,628 (1.20)   | 218 (2.52)                                                            | 4,520 (2.50)   |
| Gestational diabetes                                                        | 113 (1.02)                 | 5,483 (0.62)    | 81 (0.93)                                                             | 1,756 (0.97)   |
| Epilepsy                                                                    | 97 (0.88)                  | 2,388 (0.27)    | 83 (0.96)                                                             | 1,736 (0.96)   |
| Renal disease                                                               | 19 (0.17)                  | 819 (0.09)      | 17 (0.20)                                                             | 346 (0.19)     |
| Other psychotropic medications, N (%)                                       |                            |                 |                                                                       |                |
| Anticonvulsants                                                             | 1,841 (16.66)              | 31,681 (3.58)   | 1,641 (18.94)                                                         | 34,132 (18.90) |
| Antipsychotics                                                              | 2,447 (22.15)              | 48,657 (5.50)   | 2,175 (25.10)                                                         | 45,738 (25.33) |
| Anxiolytics                                                                 | 709 (6.42)                 | 8,189 (0.93)    | 648 (7.48)                                                            | 13,377 (7.41)  |
| Benzodiazepines                                                             | 3,268 (29.58)              | 49,063 (5.54)   | 2,853 (32.93)                                                         | 58,600 (32.45) |
| Other hypnotics                                                             | 3,041 (27.53)              | 115,608 (13.06) | 2,616 (30.19)                                                         | 53,989 (29.90) |
| Barbiturates                                                                | 825 (7.47)                 | 26,030 (2.94)   | 673 (7.77)                                                            | 14,435 (7.99)  |
| Other medications, N (%)                                                    |                            |                 |                                                                       |                |
| Antidiabetics                                                               | 400 (3.62)                 | 15,364 (1.74)   | 306 (3.53)                                                            | 6,319 (3.50)   |
| Antihypertensives                                                           | 1,612 (14.59)              | 54,170 (6.12)   | 1,290 (14.89)                                                         | 26,640 (14.75) |
| Suspected teratogenics                                                      | 832 (7.53)                 | 26,967 (3.05)   | 682 (7.87)                                                            | 14,062 (7.79)  |
| Number of distinct prescription drugs, excluding antidepressants, mean (SD) | 3.38 (3.32)                | 1.45 (2.10)     | 3.49 (3.41)                                                           | 3.34 (13.03)   |

<sup>(1)</sup> To account for PS, the untreated observations were weighted using the distribution of the treated among PS strata

<sup>(2)</sup> Relates to current pregnancy



**Table S13 Cohort characteristics for all antidepressants combined; overall unadjusted and depression restricted adjusted.  
Medicaid Analytic eXtract, 2000-2007.**

| Characteristic                             | Overall cohort, unadjusted        |                 | Depression restricted cohort, Accounting for PS strata <sup>(1)</sup> |                   |
|--------------------------------------------|-----------------------------------|-----------------|-----------------------------------------------------------------------|-------------------|
|                                            | Any Antidepressant <sup>(3)</sup> | Unexposed       | Any Antidepressant                                                    | Unexposed         |
| N                                          | 64,389                            | 885,115         | 49,527                                                                | 180,422           |
| Age, mean (SD)                             | 25.71 (5.96)                      | 23.85 (5.75)    | 25.65 (5.97)                                                          | 25.41 (51.75)     |
| Year of delivery, N (%)                    |                                   |                 |                                                                       |                   |
| 2000-2002                                  | 11,221 (17.43)                    | 187,511 (21.19) | 7,596 (15.34)                                                         | 28,089 (15.57)    |
| 2003-2005                                  | 33,826 (52.53)                    | 426,522 (48.19) | 25,884 (52.26)                                                        | 93,925 (52.06)    |
| 2006-2007                                  | 19,342 (30.04)                    | 271,082 (30.63) | 16,047 (32.40)                                                        | 58,408 (32.37)    |
| Race, N (%)                                |                                   |                 |                                                                       |                   |
| White                                      | 47,221 (73.34)                    | 339,144 (38.32) | 36,898 (74.50)                                                        | 136,968 (75.92)   |
| Black                                      | 7,982 (12.40)                     | 313,369 (35.40) | 5,679 (11.47)                                                         | 19,523 (10.82)    |
| Hispanic                                   | 5,709 (8.87)                      | 164,317 (18.56) | 4,227 (8.53)                                                          | 14,402 (7.98)     |
| Other or unknown                           | 3,477 (5.40)                      | 68,285 (7.71)   | 2,723 (5.50)                                                          | 9,528 (5.28)      |
| Multipara, N (%)                           | 51,660 (80.23)                    | 706,656 (79.84) | 39,011 (78.77)                                                        | 142,607 (79.04)   |
| Multiple gestation, N (%)                  | 2,505 (3.89)                      | 31,258 (3.53)   | 1,905 (3.85)                                                          | 6,930 (3.84)      |
| Preterm birth, N (%) <sup>(2)</sup>        | 8,988 (13.96)                     | 98,886 (11.17)  | 7,086 (14.31)                                                         | 25,650 (14.22)    |
| Antidepressant indications, N (%)          |                                   |                 |                                                                       |                   |
| Depression                                 | 49,553 (76.96)                    | 180,564 (20.40) | 49,527 (100.00%)                                                      | 180,422 (100.00%) |
| Other mental health disorders              | 6,271 (9.74)                      | 17,325 (1.96)   | 5,390 (10.88)                                                         | 19,932 (11.05)    |
| Pain related diagnoses                     | 7,094 (11.02)                     | 24,527 (2.77)   | 5,416 (10.94)                                                         | 20,434 (11.33)    |
| Sleep disorders                            | 2,254 (3.50)                      | 3,319 (0.38)    | 1,789 (3.61)                                                          | 7,108 (3.94)      |
| Premenstrual tension syndrome              | 205 (0.32)                        | 453 (0.05)      | 126 (0.25)                                                            | 475 (0.26)        |
| Smoking                                    | 3,805 (5.91)                      | 17,769 (2.01)   | 3,135 (6.33)                                                          | 11,698 (6.48)     |
| Chronic fatigue syndrome                   | 5,011 (7.78)                      | 20,623 (2.33)   | 3,938 (7.95)                                                          | 14,791 (8.20)     |
| Proxies for depression severity, mean (SD) |                                   |                 |                                                                       |                   |

| Characteristic                                                              | Overall cohort, unadjusted        |                 | Depression restricted cohort, Accounting for PS strata <sup>(1)</sup> |                |
|-----------------------------------------------------------------------------|-----------------------------------|-----------------|-----------------------------------------------------------------------|----------------|
|                                                                             | Any Antidepressant <sup>(3)</sup> | Unexposed       | Any Antidepressant                                                    | Unexposed      |
| Number of outpatient depression diagnoses                                   | 2.65 (6.40)                       | 0.24 (2.04)     | 3.44 (7.10)                                                           | 3.27 (20.18)   |
| Number of inpatient depression diagnoses                                    | 0.05 (0.25)                       | 0.00 (0.06)     | 0.06 (0.29)                                                           | 0.05 (0.83)    |
| Chronic maternal illness, N (%)                                             |                                   |                 |                                                                       |                |
| Hypertension                                                                | 2,410 (3.74)                      | 12,573 (1.42)   | 1,842 (3.72)                                                          | 6,861 (3.80)   |
| Diabetes                                                                    | 1,870 (2.90)                      | 10,628 (1.20)   | 1,378 (2.78)                                                          | 5,124 (2.84)   |
| Gestational diabetes                                                        | 694 (1.08)                        | 5,483 (0.62)    | 519 (1.05)                                                            | 1,900 (1.05)   |
| Epilepsy                                                                    | 530 (0.82)                        | 2,388 (0.27)    | 428 (0.86)                                                            | 1,713 (0.95)   |
| Renal disease                                                               | 118 (0.18)                        | 819 (0.09)      | 99 (0.20)                                                             | 348 (0.19)     |
| Other psychotropic medications, N (%)                                       |                                   |                 |                                                                       |                |
| Anticonvulsants                                                             | 11,227 (17.44)                    | 31,681 (3.58)   | 9,933 (20.06)                                                         | 36,861 (20.43) |
| Antipsychotics                                                              | 13,719 (21.31)                    | 48,657 (5.50)   | 12,275 (24.78)                                                        | 45,143 (25.02) |
| Anxiolytics                                                                 | 4,338 (6.74)                      | 8,189 (0.93)    | 3,955 (7.99)                                                          | 14,643 (8.12)  |
| Benzodiazepines                                                             | 20,257 (31.46)                    | 49,063 (5.54)   | 17,705 (35.75)                                                        | 64,523 (35.76) |
| Other hypnotics                                                             | 18,892 (29.34)                    | 115,608 (13.06) | 16,065 (32.44)                                                        | 58,554 (32.45) |
| Barbiturates                                                                | 5,798 (9.00)                      | 26,030 (2.94)   | 4,535 (9.16)                                                          | 17,360 (9.62)  |
| Other medications, N (%)                                                    |                                   |                 |                                                                       |                |
| Antidiabetics                                                               | 2,471 (3.84)                      | 15,364 (1.74)   | 1,852 (3.74)                                                          | 6,827 (3.78)   |
| Antihypertensives                                                           | 10,092 (15.67)                    | 54,170 (6.12)   | 7,965 (16.08)                                                         | 29,786 (16.51) |
| Suspected teratogenics                                                      | 5,174 (8.04)                      | 26,967 (3.05)   | 3,994 (8.06)                                                          | 15,157 (8.40)  |
| Number of distinct prescription drugs, excluding antidepressants, mean (SD) | 3.57 (3.38)                       | 1.45 (2.10)     | 3.66 (3.45)                                                           | 3.57 (12.54)   |

<sup>(1)</sup> To account for PS, the untreated observations were weighted using the distribution of the treated among PS strata

<sup>(2)</sup> Relates to current pregnancy

<sup>(3)</sup> The total number of exposed pregnancies is less than the sum of pregnancies across exposure groups due to polytherapy.

**Table S14 Absolute risk for congenital cardiac malformations in women with and without antidepressant exposure by class; depression restricted cohort. Medicaid Analytic eXtract, 2000-2007.**

| Exposure groups     | Any cardiac malformation |        | RVOTO          |        | VSD            |        | Other cardiac malformation |        |                |
|---------------------|--------------------------|--------|----------------|--------|----------------|--------|----------------------------|--------|----------------|
|                     | Total                    | Events | Risk (/10,000) | Events | Risk (/10,000) | Events | Risk (/10,000)             | Events | Risk (/10,000) |
| Unexposed           | 180,564                  | 1,497  | 82.9           | 246    | 13.6           | 751    | 41.6                       | 743    | 41.2           |
| All antidepressants | 49,553                   | 460    | 92.8           | 69     | 13.9           | 211    | 42.6                       | 259    | 52.3           |
| SSRI                | 36,783                   | 341    | 92.7           | 53     | 14.4           | 155    | 42.1                       | 189    | 51.4           |
| Paroxetine          | 8,763                    | 71     | 81.0           | 13     | 14.8           | 28     | 32.0                       | 40     | 45.7           |
| Sertraline          | 11,074                   | 106    | 95.7           | 17     | 15.4           | 50     | 45.2                       | 57     | 51.5           |
| Fluoxetine          | 8,680                    | 84     | 96.8           | 12     | 13.8           | 41     | 47.2                       | 45     | 51.8           |
| TCA                 | 3,328                    | 27     | 81.1           | <11    | 15.0           | 15     | 45.1                       | 13     | 39.1           |
| SNRI                | 6,014                    | 69     | 114.7          | 12     | 20.0           | 34     | 56.5                       | 37     | 61.5           |
| Other               | 6,039                    | 64     | 106.0          | <11    | 8.3            | 26     | 43.1                       | 40     | 66.2           |
| Bupropion           | 6,704                    | 57     | 85.0           | 10     | 14.9           | 26     | 38.8                       | 37     | 55.2           |

**Table S15 Relative risks and 95% confidence intervals comparing the risk for cardiac malformations between exposed and unexposed women with conventional PS and high-dimensional PS adjustment; restricted to women with depression diagnosis. Medicaid Analytic eXtract 2000-2007.**

| Exposure                          | Depression Restricted and PS Stratification |         |            |       |                   | Depression Restricted and hdPS Stratification* |         |            |       |                   |
|-----------------------------------|---------------------------------------------|---------|------------|-------|-------------------|------------------------------------------------|---------|------------|-------|-------------------|
|                                   | N Patients                                  |         | N Outcomes |       | OR (95% CI)       | N Patients                                     |         | N Outcomes |       | OR (95% CI)       |
|                                   | Exp                                         | Unexp   | Exp        | Unexp |                   | Exp                                            | Unexp   | Exp        | Unexp |                   |
| <b>Any cardiac malformation</b>   |                                             |         |            |       |                   |                                                |         |            |       |                   |
| ANTIDEP                           | 49,527                                      | 180,422 | 460        | 1,496 | 1.02 (0.90, 1.15) | 49,553                                         | 180,563 | 460        | 1,497 | 1.04 (0.92, 1.18) |
| SSRI                              | 36,778                                      | 180,564 | 341        | 1,497 | 1.06 (0.93, 1.22) | 36,783                                         | 180,564 | 341        | 1,497 | 1.08 (0.94, 1.23) |
| PAROXETINE                        | 8,748                                       | 180,564 | 71         | 1,497 | 0.94 (0.73, 1.21) | 8,756                                          | 180,564 | 71         | 1,497 | 0.93 (0.72, 1.19) |
| SERTRALINE                        | 11,056                                      | 180,564 | 106        | 1,497 | 1.09 (0.88, 1.34) | 11,045                                         | 180,564 | 106        | 1,497 | 1.06 (0.86, 1.32) |
| FLUOXETINE                        | 8,664                                       | 180,563 | 84         | 1,497 | 1.14 (0.90, 1.44) | 8,676                                          | 180,563 | 84         | 1,497 | 1.10 (0.87, 1.40) |
| TCAS                              | 3,314                                       | 180,562 | 27         | 1,497 | 0.77 (0.52, 1.14) | 3,287                                          | 180,547 | 27         | 1,497 | 0.72 (0.48, 1.08) |
| SNRIS                             | 6,010                                       | 180,564 | 69         | 1,497 | 1.20 (0.91, 1.57) | 5,999                                          | 180,564 | 69         | 1,497 | 1.20 (0.91, 1.56) |
| OTHER                             | 6,021                                       | 180,564 | 64         | 1,497 | 1.21 (0.91, 1.60) | 6,039                                          | 180,564 | 64         | 1,497 | 1.16 (0.87, 1.53) |
| BUPROPION                         | 6,691                                       | 180,563 | 57         | 1,497 | 0.92 (0.69, 1.22) | 6,698                                          | 180,563 | 57         | 1,497 | 0.95 (0.71, 1.26) |
| <b>Other cardiac malformation</b> |                                             |         |            |       |                   |                                                |         |            |       |                   |
| ANTIDEP                           | 49,527                                      | 180,422 | 259        | 742   | 1.15 (0.97, 1.36) | 49,553                                         | 180,564 | 259        | 743   | 1.19 (1.01, 1.40) |
| SSRI                              | 36,778                                      | 180,564 | 189        | 743   | 1.19 (0.99, 1.43) | 36,783                                         | 180,561 | 189        | 743   | 1.21 (1.00, 1.45) |
| PAROXETINE                        | 8,748                                       | 180,564 | 40         | 743   | 1.10 (0.78, 1.55) | 8,751                                          | 180,564 | 40         | 743   | 1.08 (0.77, 1.52) |
| SERTRALINE                        | 11,056                                      | 180,564 | 57         | 743   | 1.19 (0.89, 1.59) | 11,069                                         | 180,564 | 57         | 743   | 1.19 (0.89, 1.59) |
| FLUOXETINE                        | 8,664                                       | 180,563 | 45         | 743   | 1.23 (0.89, 1.70) | 8,655                                          | 180,563 | 45         | 743   | 1.22 (0.88, 1.69) |
| TCAS                              | 3,314                                       | 180,562 | 13         | 743   | 0.79 (0.45, 1.40) | 3,296                                          | 180,564 | 13         | 743   | 0.69 (0.38, 1.24) |
| SNRIS                             | 6,010                                       | 180,564 | 37         | 743   | 1.31 (0.90, 1.90) | 6,001                                          | 180,564 | 37         | 743   | 1.36 (0.94, 1.97) |
| OTHER                             | 6,021                                       | 180,564 | 40         | 743   | 1.65 (1.15, 2.37) | 6,039                                          | 180,564 | 40         | 743   | 1.67 (1.17, 2.39) |
| BUPROPION                         | 6,691                                       | 180,563 | 37         | 743   | 1.16 (0.81, 1.67) | 6,687                                          | 180,564 | 37         | 743   | 1.26 (0.88, 1.81) |
| <b>RVOTO</b>                      |                                             |         |            |       |                   |                                                |         |            |       |                   |
| ANTIDEP                           | 49,527                                      | 180,422 | 69         | 246   | 0.92 (0.67, 1.25) | 49,553                                         | 180,559 | 69         | 246   | 0.91 (0.67, 1.24) |
| SSRI                              | 36,778                                      | 180,564 | 53         | 246   | 0.99 (0.70, 1.38) | 36,783                                         | 180,564 | 53         | 246   | 0.99 (0.70, 1.38) |
| PAROXETINE                        | 8,748                                       | 180,564 | 13         | 246   | 1.07 (0.59, 1.93) | 8,760                                          | 180,564 | 13         | 246   | 1.03 (0.57, 1.85) |
| SERTRALINE                        | 11,056                                      | 180,564 | 17         | 246   | 1.12 (0.67, 1.88) | 11,064                                         | 180,564 | 17         | 246   | 1.08 (0.64, 1.82) |

| Exposure   | Depression Restricted and PS Stratification |         |            |       |                    | Depression Restricted and hdPS Stratification* |         |            |       |                   |
|------------|---------------------------------------------|---------|------------|-------|--------------------|------------------------------------------------|---------|------------|-------|-------------------|
|            | N Patients                                  |         | N Outcomes |       | OR (95% CI)        | N Patients                                     |         | N Outcomes |       | OR (95% CI)       |
|            | Exp                                         | Unexp   | Exp        | Unexp |                    | Exp                                            | Unexp   | Exp        | Unexp |                   |
| FLUOXETINE | 8,664                                       | 180,563 | 12         | 246   | 0.93 (0.50 , 1.72) | 8,676                                          | 180,564 | 12         | 246   | 0.87 (0.47, 1.63) |
| TCAS       | 3,314                                       | 180,562 | <11        | 246   | 0.94 (0.37 , 2.36) | 3,298                                          | 180,563 | <11        | 246   | 0.88 (0.35, 2.23) |
| SNRIS      | 6,010                                       | 180,564 | 12         | 246   | 1.06 (0.55 , 2.05) | 6,005                                          | 180,564 | 12         | 246   | 1.06 (0.55, 2.04) |
| OTHER      | 6,021                                       | 180,564 | <11        | 246   | 0.61 (0.24 , 1.52) | 6,039                                          | 180,564 | <11        | 246   | 0.54 (0.21, 1.35) |
| BUPROPION  | 6,691                                       | 180,563 | <11        | 246   | 1.09 (0.56 , 2.10) | 6,696                                          | 180,564 | <11        | 246   | 1.07 (0.55, 2.08) |
| <b>VSD</b> |                                             |         |            |       |                    |                                                |         |            |       |                   |
| ANTIDEP    | 49,527                                      | 180,422 | 211        | 751   | 0.95 (0.79 , 1.14) | 49,553                                         | 180,557 | 211        | 751   | 0.96 (0.80, 1.15) |
| SSRI       | 36,778                                      | 180,564 | 155        | 751   | 0.98 (0.81 , 1.20) | 36,783                                         | 180,564 | 155        | 751   | 0.99 (0.81, 1.21) |
| PAROXETINE | 8,748                                       | 180,564 | 28         | 751   | 0.73 (0.49 , 1.09) | 8,760                                          | 180,564 | 28         | 751   | 0.73 (0.49, 1.08) |
| SERTRALINE | 11,056                                      | 180,564 | 50         | 751   | 1.04 (0.76 , 1.41) | 11,065                                         | 180,564 | 50         | 751   | 0.98 (0.72, 1.34) |
| FLUOXETINE | 8,664                                       | 180,563 | 41         | 751   | 1.12 (0.80 , 1.57) | 8,676                                          | 180,563 | 41         | 751   | 1.04 (0.74, 1.46) |
| TCAS       | 3,314                                       | 180,562 | 15         | 751   | 0.86 (0.50 , 1.47) | 3,304                                          | 180,564 | 15         | 751   | 0.85 (0.50, 1.46) |
| SNRIS      | 6,010                                       | 180,564 | 34         | 751   | 1.24 (0.85 , 1.82) | 5,993                                          | 180,564 | 34         | 751   | 1.18 (0.80, 1.73) |
| OTHER      | 6,021                                       | 180,564 | 26         | 751   | 0.99 (0.64 , 1.53) | 6,039                                          | 180,564 | 26         | 751   | 0.91 (0.59, 1.40) |
| BUPROPION  | 6,691                                       | 180,563 | 26         | 751   | 0.88 (0.58 , 1.34) | 6,696                                          | 180,564 | 26         | 751   | 0.86 (0.57, 1.31) |

\* The predefined covariates along with 200 empirically identified potential confounding variables were included in the high dimensional propensity score

**Table S16 Relative risks and 95% confidence intervals comparing the risk for cardiac malformations between exposed and unexposed women, stratified by age and race; restricted to women with depression diagnosis with PS adjustment. Medicaid Analytic eXtract 2000-2007.**

| Exposure    | N Patients           |         | N Outcomes |       | OR (95% CI)       | N Patients       |        | N Outcomes |       | OR (95% CI)       |
|-------------|----------------------|---------|------------|-------|-------------------|------------------|--------|------------|-------|-------------------|
|             | Exp                  | Unexp   | Exp        | Unexp |                   | Exp              | Unexp  | Exp        | Unexp |                   |
| <b>Age</b>  | <b>&lt;30</b>        |         |            |       |                   | <b>&gt;=30</b>   |        |            |       |                   |
| ANTIDEP     | 37,346               | 153,127 | 325        | 1240  | 1.00 (0.87, 1.15) | 12,190           | 27,373 | 135        | 257   | 1.09 (0.85, 1.39) |
| SSRI        | 27,923               | 153,189 | 244        | 1240  | 1.05 (0.90, 1.23) | 8,824            | 27,375 | 97         | 257   | 1.13 (0.87, 1.49) |
| PAROXETINE  | 6,446                | 153,187 | 50         | 1240  | 0.95 (0.70, 1.29) | 2,295            | 27,368 | 21         | 257   | 0.98 (0.60, 1.58) |
| SERTRALINE  | 8,527                | 153,185 | 72         | 1240  | 1.00 (0.78, 1.29) | 2,517            | 27,375 | 34         | 257   | 1.30 (0.88, 1.93) |
| FLUOXETINE  | 6,492                | 153,187 | 62         | 1240  | 1.17 (0.89, 1.54) | 2,156            | 27,375 | 22         | 257   | 1.09 (0.68, 1.75) |
| TCAS        | 2,247                | 153,178 | 20         | 1240  | 0.91 (0.58, 1.44) | 1,053            | 27,366 | <11        | 257   | 0.55 (0.25, 1.22) |
| SNRIS       | 4,426                | 153,186 | 52         | 1240  | 1.26 (0.93, 1.72) | 1,555            | 27,375 | 16         | 257   | 0.98 (0.56, 1.73) |
| OTHER       | 4,252                | 153,189 | 42         | 1240  | 1.22 (0.87, 1.71) | 1,747            | 27,375 | 22         | 257   | 1.22 (0.74, 2.03) |
| BUPROPION   | 4,917                | 153,187 | 37         | 1240  | 0.87 (0.61, 1.23) | 1,759            | 27,374 | 20         | 257   | 1.13 (0.68, 1.86) |
| <b>Race</b> | <b>Non-caucasian</b> |         |            |       |                   | <b>Caucasian</b> |        |            |       |                   |
| ANTIDEP     | 12,629               | 84,302  | 94         | 678   | 0.87 (0.68, 1.12) | 36,915           | 96,254 | 366        | 819   | 1.09 (0.94, 1.25) |
| SSRI        | 9,477                | 84,302  | 76         | 678   | 0.94 (0.71, 1.23) | 27,286           | 96,166 | 265        | 817   | 1.11 (0.95, 1.31) |
| PAROXETINE  | 2,457                | 84,294  | 14         | 678   | 0.69 (0.40, 1.21) | 6,274            | 96,259 | 57         | 819   | 1.06 (0.79, 1.41) |
| SERTRALINE  | 2,875                | 84,301  | 30         | 678   | 1.11 (0.74, 1.67) | 8,160            | 96,262 | 76         | 819   | 1.07 (0.83, 1.37) |
| FLUOXETINE  | 2,324                | 84,300  | 17         | 678   | 0.89 (0.53, 1.50) | 6,324            | 96,262 | 67         | 819   | 1.23 (0.94, 1.60) |
| TCAS        | 979                  | 84,272  | <11        | 677   | 0.57 (0.23, 1.39) | 2,332            | 96,252 | 22         | 819   | 0.89 (0.57, 1.38) |
| SNRIS       | 1,082                | 84,299  | <11        | 678   | 0.48 (0.19, 1.23) | 4,896            | 96,262 | 64         | 819   | 1.34 (1.01, 1.78) |
| OTHER       | 1,753                | 84,300  | 11         | 678   | 0.67 (0.35, 1.27) | 4,245            | 96,262 | 52         | 819   | 1.45 (1.06, 1.99) |
| BUPROPION   | 1,404                | 84,294  | 12         | 678   | 1.13 (0.62, 2.05) | 5,271            | 96,262 | 45         | 819   | 0.91 (0.66, 1.26) |

Formal statistical tests provided no evidence of treatment effect heterogeneity (all p-values  $\geq 0.05$ ). Conclusions about the presence/absence of effect-measure modification are not based on the findings from formal statistical tests, but on a comparison of the effect estimates across exposure groups.

**Table S17 Relative risks and 95% confidence intervals comparing the risk for cardiac malformations between exposed and unexposed women, stratified by low, medium, and high dose; restricted to women with depression diagnosis with PS adjustment. Medicaid Analytic eXtract 2000-2007.**

| Exposure           | <i>FIRST DOSE</i> |         |            |       |                           | <i>HIGHEST DOSE</i> |         |            |       |                   |
|--------------------|-------------------|---------|------------|-------|---------------------------|---------------------|---------|------------|-------|-------------------|
|                    | N Patients        |         | N Outcomes |       | OR (95% CI)               | N Patients          |         | N Outcomes |       | OR (95% CI)       |
|                    | Exp               | Unexp   | Exp        | Unexp |                           | Exp                 | Unexp   | Exp        | Unexp |                   |
| <i>Low Dose</i>    |                   |         |            |       |                           |                     |         |            |       |                   |
| ANTIDEP            | 12,327            | 180,564 | 106        | 1,497 | 0.92 (0.74, 1.14)         | 10,893              | 180,564 | 94         | 1,497 | 0.92 (0.74, 1.15) |
| SSRI               | 5,742             | 180,558 | 54         | 1,497 | 1.10 (0.83, 1.46)         | 5,524               | 180,534 | 51         | 1,497 | 1.06 (0.79, 1.42) |
| PAROXETINE         | 1,068             | 180,533 | 14         | 1,497 | 1.59 (0.93, 2.72)         | 1,069               | 180,530 | 13         | 1,497 | 1.44 (0.83, 2.52) |
| SERTRALINE         | 3,706             | 180,540 | 35         | 1,497 | 1.09 (0.77, 1.54)         | 3,952               | 180,549 | 36         | 1,497 | 1.06 (0.75, 1.49) |
| FLUOXETINE         | 800               | 180,532 | <11        | 1,496 | 0.29 (0.07, 1.18)         | 856                 | 180,531 | <11        | 1,497 | 0.42 (0.13, 1.31) |
| TCAS               | 1,874             | 180,533 | 16         | 1,497 | 0.79 (0.47, 1.31)         | 2,122               | 180,550 | 18         | 1,497 | 0.79 (0.49, 1.28) |
| SNRIS              | 854               | 180,516 | <11        | 1,496 | 1.07 (0.56, 2.08)         | 895                 | 180,544 | 11         | 1,497 | 1.11 (0.58, 2.11) |
| OTHER              | 2,517             | 180,556 | 28         | 1,497 | 1.20 (0.80, 1.80)         | 2,920               | 180,561 | 35         | 1,497 | 1.33 (0.92, 1.92) |
| BUPROPION          | 3,435             | 180,559 | 19         | 1,497 | 0.62 (0.39, 0.99)         | 4,089               | 180,563 | 27         | 1,497 | 0.73 (0.49, 1.09) |
| <i>Medium dose</i> |                   |         |            |       |                           |                     |         |            |       |                   |
| ANTIDEP            | 20,442            | 180,564 | 201        | 1,497 | 1.10 (0.92, 1.30)         | 21,046              | 180,564 | 204        | 1,497 | 1.08 (0.91, 1.28) |
| SSRI               | 16,489            | 180,564 | 163        | 1,497 | 1.12 (0.93, 1.34)         | 17,432              | 180,564 | 171        | 1,497 | 1.11 (0.93, 1.33) |
| PAROXETINE         | 3,925             | 180,553 | 28         | 1,497 | 0.80 (0.54, 1.18)         | 4,158               | 180,560 | 30         | 1,497 | 0.81 (0.56, 1.19) |
| SERTRALINE         | 3,962             | 180,554 | 49         | 1,497 | 1.33 (0.98, 1.80)         | 4,573               | 180,564 | 55         | 1,497 | 1.25 (0.94, 1.68) |
| FLUOXETINE         | 4,338             | 180,552 | 44         | 1,496 | 1.25 (0.91, 1.71)         | 4,987               | 180,562 | 51         | 1,497 | 1.23 (0.92, 1.66) |
| TCAS               | 114               | 178,949 | <11        | 1,487 | <0.001 (<0.001, >999.999) | 145                 | 179,612 | <11        | 1,495 | 0.61 (0.08, 4.50) |
| SNRIS              | 3,095             | 180,562 | 25         | 1,496 | 0.86 (0.56, 1.31)         | 3,323               | 180,561 | 32         | 1,496 | 1.01 (0.69, 1.48) |
| OTHER              | 1,041             | 180,541 | 11         | 1,497 | 1.09 (0.58, 2.03)         | 1,203               | 180,547 | 14         | 1,497 | 1.22 (0.69, 2.14) |
| BUPROPION          | 127               | 180,489 | <11        | 1,495 | 1.67 (0.39, 7.17)         | 161                 | 180,532 | <11        | 1,496 | 1.29 (0.30, 5.52) |
| <i>High dose</i>   |                   |         |            |       |                           |                     |         |            |       |                   |
| ANTIDEP            | 5,413             | 180,564 | 56         | 1,497 | 1.12 (0.83, 1.50)         | 6,240               | 180,564 | 65         | 1,497 | 1.12 (0.84, 1.47) |
| SSRI               | 4,529             | 180,561 | 41         | 1,497 | 0.96 (0.69, 1.35)         | 5,185               | 180,561 | 48         | 1,497 | 0.99 (0.72, 1.36) |
| PAROXETINE         | 1,120             | 180,515 | 13         | 1,495 | 1.23 (0.70, 2.16)         | 1,303               | 180,542 | 16         | 1,497 | 1.35 (0.80, 2.25) |

| Exposure            | <i>FIRST DOSE</i> |         |            |       |                   | <i>HIGHEST DOSE</i> |         |            |       |                   |
|---------------------|-------------------|---------|------------|-------|-------------------|---------------------|---------|------------|-------|-------------------|
|                     | N Patients        |         | N Outcomes |       | OR (95% CI)       | N Patients          |         | N Outcomes |       | OR (95% CI)       |
|                     | Exp               | Unexp   | Exp        | Unexp |                   | Exp                 | Unexp   | Exp        | Unexp |                   |
| SERTRALINE          | 63                | 180,521 | <11        | 1,497 | 1.29 (0.18, 9.46) | 86                  | 180,498 | <11        | 1,496 | 0.98 (0.13, 7.23) |
| FLUOXETINE          | 682               | 180,510 | <11        | 1,496 | 0.59 (0.22, 1.61) | 811                 | 180,539 | <11        | 1,497 | 0.55 (0.22, 1.39) |
| TCAS <sup>(1)</sup> |                   |         |            |       |                   |                     |         |            |       |                   |
| SNRIS               | 161               | 180,501 | <11        | 1,496 | 0.71 (0.10, 5.11) | 196                 | 180,507 | <11        | 1,496 | 1.68 (0.52, 5.48) |
| OTHER               | 99                | 180,488 | <11        | 1,496 | 1.11 (0.15, 8.39) | 124                 | 180,481 | <11        | 1,496 | 1.07 (0.15, 7.81) |
| BUPROPION           | 649               | 180,517 | 13         | 1,496 | 2.18 (1.22, 3.91) | 797                 | 180,549 | 14         | 1,496 | 1.87 (1.06, 3.30) |

<sup>(1)</sup> No patients were treated with this dose



**Table S18 Relative risks and 95% confidence intervals comparing the risk for cardiac malformations between exposed and unexposed women, varying the exposure definitions; restricted to women with depression diagnosis with PS adjustment. Medicaid Analytic eXtract 2000-2007.**

| Exposure                                                  | N Patients |         | N Outcomes |       | OR (95% CI)       |
|-----------------------------------------------------------|------------|---------|------------|-------|-------------------|
|                                                           | Exp        | Unexp   | Exp        | Unexp |                   |
| <b>Exposed: ≥1 Dispensing during the first trimester</b>  |            |         |            |       |                   |
| ANTIDEP                                                   | 29,056     | 181,164 | 282        | 1,503 | 1.09 (0.94, 1.26) |
| SSRI                                                      | 28,168     | 181,164 | 270        | 1,503 | 1.11 (0.95, 1.29) |
| PAROXETINE                                                | 6,543      | 181,163 | 59         | 1,503 | 1.04 (0.79, 1.37) |
| SERTRALINE                                                | 8,617      | 181,164 | 92         | 1,503 | 1.19 (0.95, 1.49) |
| FLUOXETINE                                                | 6,660      | 181,164 | 60         | 1,503 | 1.06 (0.80, 1.40) |
| TCAS                                                      | 2,281      | 181,157 | 19         | 1,503 | 0.78 (0.48, 1.25) |
| SNRIS                                                     | 4,442      | 181,164 | 46         | 1,503 | 1.03 (0.75, 1.43) |
| OTHER                                                     | 4,264      | 181,164 | 50         | 1,503 | 1.31 (0.95, 1.80) |
| BUPROPION                                                 | 5,058      | 181,164 | 43         | 1,503 | 0.93 (0.67, 1.28) |
| <b>Exposed: ≥2 Dispensings during the first trimester</b> |            |         |            |       |                   |
| ANTIDEP                                                   | 17,834     | 181,164 | 188        | 1,503 | 1.14 (0.95, 1.36) |
| SSRI                                                      | 11,430     | 181,164 | 116        | 1,503 | 1.14 (0.92, 1.41) |
| PAROXETINE                                                | 2,602      | 181,152 | 28         | 1,503 | 1.24 (0.84, 1.84) |
| SERTRALINE                                                | 3,164      | 181,159 | 34         | 1,503 | 1.17 (0.82, 1.67) |
| FLUOXETINE                                                | 2,419      | 181,154 | 25         | 1,503 | 1.21 (0.80, 1.83) |
| TCAS                                                      | 654        | 181,124 | <11        | 1,502 | 0.93 (0.43, 2.02) |
| SNRIS                                                     | 1,966      | 181,153 | 26         | 1,502 | 1.34 (0.87, 2.05) |
| OTHER                                                     | 1,285      | 181,161 | 18         | 1,503 | 1.50 (0.90, 2.51) |
| BUPROPION                                                 | 1,409      | 181,144 | 18         | 1,503 | 1.35 (0.82, 2.21) |
| <b>Reference group: No exposure throughout pregnancy</b>  |            |         |            |       |                   |
| ANTIDEP                                                   | 49,553     | 168,783 | 460        | 1,402 | 0.99 (0.87, 1.13) |
| SSRI                                                      | 36,759     | 169,029 | 341        | 1,403 | 1.04 (0.91, 1.20) |
| PAROXETINE                                                | 8,757      | 169,028 | 71         | 1,403 | 0.92 (0.71, 1.20) |
| SERTRALINE                                                | 11,059     | 169,029 | 106        | 1,403 | 1.04 (0.84, 1.29) |
| FLUOXETINE                                                | 8,655      | 169,029 | 84         | 1,403 | 1.09 (0.86, 1.39) |

| Exposure  | N Patients |         | N Outcomes |       | OR (95% CI)       |
|-----------|------------|---------|------------|-------|-------------------|
|           | Exp        | Unexp   | Exp        | Unexp |                   |
| TCAS      | 3,314      | 169,028 | 27         | 1,403 | 0.73 (0.49, 1.10) |
| SNRIS     | 6,009      | 169,029 | 69         | 1,403 | 1.11 (0.84, 1.47) |
| OTHER     | 6,006      | 169,029 | 64         | 1,403 | 1.15 (0.86, 1.53) |
| BUPROPION | 6,697      | 169,029 | 57         | 1,403 | 0.87 (0.66, 1.17) |

**Table S19 Relative risks and 95% confidence intervals comparing the risk for cardiac malformations between exposed and unexposed women, varying the outcome definitions; restricted to women with depression diagnosis with PS adjustment. Medicaid Analytic eXtract 2000-2007.**

| Exposure                          | Inpatient diagnosis of cardiac malformation |         |            |       |                   | 12 months follow-up to ascertain cardiac malformation <sup>(1)</sup> |         |            |       |                   |
|-----------------------------------|---------------------------------------------|---------|------------|-------|-------------------|----------------------------------------------------------------------|---------|------------|-------|-------------------|
|                                   | N Patients                                  |         | N Outcomes |       | OR (95% CI)       | N Patients                                                           |         | N Outcomes |       | OR (95% CI)       |
|                                   | Exp                                         | Unexp   | Exp        | Unexp |                   | Exp                                                                  | Unexp   | Exp        | Unexp |                   |
| <b>Any cardiac malformation</b>   |                                             |         |            |       |                   |                                                                      |         |            |       |                   |
| ANTIDEP                           | 49,527                                      | 180,422 | 335        | 1,128 | 0.96 (0.83, 1.11) | 33,275                                                               | 116,987 | 169        | 517   | 0.98 (0.80, 1.20) |
| SSRI                              | 36,778                                      | 180,564 | 249        | 1,129 | 1.00 (0.85, 1.17) | 24,918                                                               | 117,042 | 116        | 517   | 0.91 (0.72, 1.15) |
| PAROXETINE                        | 8,748                                       | 180,564 | 50         | 1,129 | 0.84 (0.62, 1.14) | 6,274                                                                | 117,040 | 17         | 517   | 0.53 (0.32, 0.89) |
| SERTRALINE                        | 11,056                                      | 180,564 | 78         | 1,129 | 1.02 (0.80, 1.31) | 7,507                                                                | 117,042 | 43         | 517   | 1.16 (0.83, 1.62) |
| FLUOXETINE                        | 8,664                                       | 180,563 | 66         | 1,129 | 1.18 (0.90, 1.54) | 5,671                                                                | 117,040 | 24         | 517   | 0.75 (0.48, 1.16) |
| TCAS                              | 3,314                                       | 180,562 | 18         | 1,129 | 0.66 (0.41, 1.08) | 2,217                                                                | 117,034 | 17         | 517   | 1.33 (0.80, 2.23) |
| SNRIS                             | 6,010                                       | 180,564 | 48         | 1,129 | 1.05 (0.76, 1.45) | 4,007                                                                | 117,042 | 27         | 517   | 1.25 (0.81, 1.93) |
| OTHER                             | 6,021                                       | 180,564 | 51         | 1,129 | 1.26 (0.92, 1.73) | 3,988                                                                | 117,042 | 17         | 517   | 0.93 (0.56, 1.57) |
| BUPROPION                         | 6,691                                       | 180,563 | 43         | 1,129 | 0.89 (0.64, 1.24) | 4,295                                                                | 117,042 | 26         | 517   | 1.12 (0.73, 1.71) |
| <b>Other cardiac malformation</b> |                                             |         |            |       |                   |                                                                      |         |            |       |                   |
| ANTIDEP                           | 49,527                                      | 180,422 | 205        | 608   | 1.10 (0.91, 1.33) | 33,275                                                               | 116,987 | 100        | 263   | 1.08 (0.82, 1.41) |
| SSRI                              | 36,778                                      | 180,564 | 154        | 609   | 1.16 (0.95, 1.43) | 24,918                                                               | 117,042 | 64         | 263   | 0.93 (0.68, 1.27) |
| PAROXETINE                        | 8,748                                       | 180,564 | 31         | 609   | 1.03 (0.70, 1.51) | 6,274                                                                | 117,040 | <11        | 263   | 0.41 (0.19, 0.89) |
| SERTRALINE                        | 11,056                                      | 180,564 | 50         | 609   | 1.25 (0.92, 1.71) | 7,507                                                                | 117,042 | 23         | 263   | 1.14 (0.72, 1.81) |
| FLUOXETINE                        | 8,664                                       | 180,563 | 39         | 609   | 1.31 (0.92, 1.85) | 5,671                                                                | 117,040 | 18         | 263   | 1.04 (0.62, 1.75) |
| TCAS                              | 3,314                                       | 180,562 | <11        | 609   | 0.69 (0.35, 1.37) | 2,217                                                                | 117,034 | <11        | 263   | 1.43 (0.73, 2.79) |
| SNRIS                             | 6,010                                       | 180,564 | 25         | 609   | 1.04 (0.66, 1.63) | 4,007                                                                | 117,042 | 19         | 263   | 1.58 (0.93, 2.67) |
| OTHER                             | 6,021                                       | 180,564 | 35         | 609   | 1.79 (1.22, 2.64) | 3,988                                                                | 117,042 | 13         | 263   | 1.31 (0.71, 2.40) |
| BUPROPION                         | 6,691                                       | 180,563 | 29         | 609   | 1.09 (0.72, 1.64) | 4,295                                                                | 117,042 | 15         | 263   | 1.17 (0.66, 2.05) |
| <b>RVOTO</b>                      |                                             |         |            |       |                   |                                                                      |         |            |       |                   |
| ANTIDEP                           | 49,527                                      | 180,422 | 44         | 166   | 0.81 (0.55, 1.19) | 33,275                                                               | 116,987 | 42         | 130   | 0.95 (0.63, 1.43) |
| SSRI                              | 36,778                                      | 180,564 | 32         | 166   | 0.80 (0.52, 1.23) | 24,918                                                               | 117,042 | 32         | 130   | 0.98 (0.63, 1.54) |
| PAROXETINE                        | 8,748                                       | 180,564 | <11        | 166   | 1.06 (0.52, 2.15) | 6,274                                                                | 117,040 | <11        | 130   | 0.90 (0.39, 2.11) |
| SERTRALINE                        | 11,056                                      | 180,564 | <11        | 166   | 0.64 (0.29, 1.40) | 7,507                                                                | 117,042 | 12         | 130   | 1.36 (0.72, 2.58) |

| Exposure   | Inpatient diagnosis of cardiac malformation |         |            |       |                    | 12 months follow-up to ascertain cardiac malformation <sup>(1)</sup> |         |            |       |                    |
|------------|---------------------------------------------|---------|------------|-------|--------------------|----------------------------------------------------------------------|---------|------------|-------|--------------------|
|            | N Patients                                  |         | N Outcomes |       | OR (95% CI)        | N Patients                                                           |         | N Outcomes |       | OR (95% CI)        |
|            | Exp                                         | Unexp   | Exp        | Unexp |                    | Exp                                                                  | Unexp   | Exp        | Unexp |                    |
| FLUOXETINE | 8,664                                       | 180,563 | <11        | 166   | 0.98 (0.48 , 2.00) | 5,671                                                                | 117,040 | <11        | 130   | 0.84 (0.37 , 1.93) |
| TCAS       | 3,314                                       | 180,562 | <11        | 166   | 0.78 (0.24 , 2.53) | 2,217                                                                | 117,034 | <11        | 130   | 1.25 (0.38 , 4.13) |
| SNRIS      | 6,010                                       | 180,564 | <11        | 166   | 0.93 (0.40 , 2.14) | 4,007                                                                | 117,042 | <11        | 130   | 0.73 (0.26 , 2.04) |
| OTHER      | 6,021                                       | 180,564 | <11        | 166   | 0.70 (0.25 , 1.95) | 3,988                                                                | 117,042 | <11        | 130   | 0.26 (0.04 , 1.90) |
| BUPROPION  | 6,691                                       | 180,563 | <11        | 166   | 1.60 (0.81 , 3.14) | 4,295                                                                | 117,042 | <11        | 130   | 1.59 (0.77 , 3.30) |
| <b>VSD</b> |                                             |         |            |       |                    |                                                                      |         |            |       |                    |
| ANTIDEP    | 49,527                                      | 180,422 | 139        | 537   | 0.84 (0.67 , 1.04) | 33,275                                                               | 116,987 | 74         | 251   | 0.89 (0.66 , 1.21) |
| SSRI       | 36,778                                      | 180,564 | 101        | 537   | 0.86 (0.67 , 1.09) | 24,918                                                               | 117,042 | 52         | 251   | 0.84 (0.59 , 1.18) |
| PAROXETINE | 8,748                                       | 180,564 | 18         | 537   | 0.62 (0.38 , 1.02) | 6,274                                                                | 117,040 | <11        | 251   | 0.36 (0.15 , 0.83) |
| SERTRALINE | 11,056                                      | 180,564 | 34         | 537   | 0.94 (0.65 , 1.36) | 7,507                                                                | 117,042 | 18         | 251   | 0.97 (0.58 , 1.62) |
| FLUOXETINE | 8,664                                       | 180,563 | 29         | 537   | 1.09 (0.73 , 1.63) | 5,671                                                                | 117,040 | <11        | 251   | 0.52 (0.25 , 1.06) |
| TCAS       | 3,314                                       | 180,562 | <11        | 537   | 0.77 (0.40 , 1.49) | 2,217                                                                | 117,034 | <11        | 251   | 1.35 (0.66 , 2.73) |
| SNRIS      | 6,010                                       | 180,564 | 24         | 537   | 1.15 (0.74 , 1.81) | 4,007                                                                | 117,042 | <11        | 251   | 0.98 (0.49 , 1.96) |
| OTHER      | 6,021                                       | 180,564 | 17         | 537   | 0.88 (0.52 , 1.49) | 3,988                                                                | 117,042 | <11        | 251   | 0.92 (0.43 , 1.96) |
| BUPROPION  | 6,691                                       | 180,563 | 15         | 537   | 0.68 (0.40 , 1.17) | 4,295                                                                | 117,042 | 11         | 251   | 0.96 (0.50 , 1.84) |

<sup>(1)</sup> 65% of original cohort size

**Table S20 Probabilistic bias analyses comparing the risk for cardiac malformations between exposed and unexposed women, using the positive predictive value (PPV) for any cardiac malformation from the internal validation study; restricted to women with depression diagnosis with PS adjustment. Medicaid Analytic eXtract 2000-2007.**

| Exposure | Conventional Analyses <sup>(1)</sup> |             |                |          | Probabilistic Bias Analyses <sup>(2)</sup> |             |                |          |                                   |
|----------|--------------------------------------|-------------|----------------|----------|--------------------------------------------|-------------|----------------|----------|-----------------------------------|
|          | Lower bound CI <sup>(3)</sup>        | OR          | Upper bound CI | Width CI | Lower bound CI                             | OR          | Upper bound CI | Width CI | Change from conventional analyses |
| AD       | 0.90                                 | <b>1.02</b> | 1.15           | 1.28     | 0.92                                       | <b>1.06</b> | 1.22           | 1.33     | 3.8                               |
| SSRI     | 0.94                                 | <b>1.09</b> | 1.24           | 1.32     | 0.95                                       | <b>1.11</b> | 1.31           | 1.38     | 4.2                               |
| PARO     | 0.84                                 | <b>1.11</b> | 1.43           | 1.69     | 0.87                                       | <b>1.15</b> | 1.54           | 1.77     | 4.8                               |
| SERTR    | 0.86                                 | <b>1.08</b> | 1.36           | 1.57     | 0.86                                       | <b>1.12</b> | 1.48           | 1.72     | 9.7                               |
| FLUOX    | 0.89                                 | <b>1.13</b> | 1.44           | 1.61     | 0.88                                       | <b>1.19</b> | 1.56           | 1.78     | 10.7                              |
| TCAS     | 0.39                                 | <b>0.66</b> | 1.13           | 2.93     | 0.36                                       | <b>0.65</b> | 1.20           | 3.34     | 14.2                              |
| SNRIS    | 0.83                                 | <b>1.13</b> | 1.52           | 1.84     | 0.89                                       | <b>1.24</b> | 1.73           | 1.95     | 5.9                               |
| OTHER    | 0.90                                 | <b>1.24</b> | 1.70           | 1.89     | 0.95                                       | <b>1.35</b> | 1.92           | 2.02     | 7.0                               |
| BUPRO    | 0.63                                 | <b>0.87</b> | 1.22           | 1.93     | 0.62                                       | <b>0.91</b> | 1.28           | 2.07     | 7.2                               |

<sup>(1)</sup> Adjustment for continuous PS, rather than PS-stratification as used in the primary analyses. The adjustment method was changed to allow a direct comparison with results from the probabilistic bias analysis which does not allow for PS-stratification.

<sup>(2)</sup> Distribution for bias parameters corresponding to a PPV=75.1%: Sensitivity: Min=0.5, Mode=0.75, Max=1.0; Specificity: Min=0.9985, Mode=0.99875. Max=0.999

<sup>(3)</sup> The CI represents a ‘simulation’ interval. The bias parameters are drawn from pre-specified triangular distributions; the draw is repeated over 1,000 iterations and results are accumulated to generate a frequency distribution. The simulation interval represents the 5<sup>th</sup> and the 95<sup>th</sup> percentile of the frequency distribution.

***Quantification of the potential impact of missing terminations***

Background:

The study cohort included live births only. Severe cardiac malformations that result in spontaneous abortions, stillbirths or pregnancy terminations for cardiac anomalies will therefore be missed. If a depletion of affected offspring occurred preferentially among women exposed to antidepressants versus the reference group of unexposed women (e.g., due to differences in prenatal care and screening, or differences in the propensity to terminate a pregnancy), studies restricted to live births would underestimate relative risks.

Methods:

We used the methods proposed by Greenland and Khoury<sup>2,3</sup> to quantify the potential impact of missing terminations.

| Observed (with selection bias) |                |                | “Truth” (without selection bias) |                                 |                                 |
|--------------------------------|----------------|----------------|----------------------------------|---------------------------------|---------------------------------|
|                                | Case*          | Non-case       |                                  | Case*                           | Non-case                        |
| Exposed                        | A <sub>1</sub> | B <sub>1</sub> | Exposed                          | A <sub>1</sub> /S <sub>11</sub> | B <sub>1</sub> /S <sub>01</sub> |
| Unexposed                      | A <sub>0</sub> | B <sub>0</sub> | Unexposed                        | A <sub>0</sub> /S <sub>10</sub> | B <sub>0</sub> /S <sub>00</sub> |

\*: pregnancies with a cardiac malformation

A<sub>1</sub> = Total number of cases exposed  
 A<sub>0</sub> = Total number of cases unexposed  
 B<sub>1</sub> = Total number of non-cases exposed  
 B<sub>0</sub> = Total number of non-cases unexposed

S<sub>11</sub>=probability of case selection (survival) among exposed  
 S<sub>10</sub>=probability of case selection among unexposed  
 S<sub>01</sub>=probability of non-case selection among exposed  
 S<sub>00</sub>=probability of non-case selection among unexposed

The observed or apparent odds ratio (AOR) – in the presence of selection bias - is estimated as:  
 (A<sub>1</sub>B<sub>0</sub>/A<sub>0</sub>B<sub>1</sub>)

The corrected odds ratio is estimated as:  
 $[(A_1/S_{11})(B_0/S_{00})] / [(A_0/S_{10})(B_1/S_{01})] = (A_1B_0/A_0B_1) * (S_{10}S_{01}/S_{11}S_{00}) = AOR * (S_{10}S_{01}/S_{11}S_{00})$

It should be noted that bias will only occur if *both* the cardiac defect and the exposure affect pregnancy terminations; the selection probabilities would cancel out otherwise.

Values considered for the selection probabilities

- S<sub>00</sub>: Around 48% of pregnancies are unintended, and the proportion of unintended pregnancies ending in abortion is around 45%.<sup>4</sup> Only a small proportion of these terminated unintended pregnancies would carry a fetus with a major congenital malformation. Therefore, around 20% of pregnancies (slightly less than 0.48\*0.45) are terminated for reasons other than congenital malformations (e.g. social reasons).

Informed by the literature, the probability of non-case selection among unexposed ( $S_{00}$ ) was therefore assumed to be 80% (100%-20% [terminations due to social reasons]).

- $S_{10}$ : Fewer than 20% of cardiac malformations are detected before 24 weeks of pregnancy, and less than 50% of those detected are terminated.<sup>5</sup> It has been estimated that around 10% of all pregnancies with cardiac malformations are terminated in the US.<sup>6</sup> Informed by these estimates, the probability of case selection among unexposed ( $S_{10}$ ) was therefore assumed to be 70% (100% – 20% [terminations due to social reasons] – 10% [terminations due to cardiac malformations detected early]). In addition to considering the 70% best estimate based on the literature, we also evaluated the impact of lower selection probabilities among affected pregnancies (range considered: 50-70%).
- $S_{01}$ ,  $S_{11}$ : To explore the interaction of malformation status and exposure with respect to the selection probabilities, we assumed that antidepressant exposure would decrease or increase the selection probability by up to 20%. That is,  $S_{01}=S_{00}+N\%$  and  $S_{11}=S_{10}+N\%$  with N ranging from -20% to +20%.

This combination of the four selection probabilities resulted in broad ranges for the magnitude of the potential selection bias that were represented graphically. We evaluated the impact of these selection probabilities on the relative risk estimated for SSRIs and any cardiac malformation in the main analysis (OR=1.06, 95% CI 0.93-1.22), after restricting to women with depression and adjusting for other potential confounders.

The range of values for the selection probabilities considered in the sensitivity analyses are summarized in the table below:

|           | Selection probabilities                        |                                                                              |                                          |                                                                              |
|-----------|------------------------------------------------|------------------------------------------------------------------------------|------------------------------------------|------------------------------------------------------------------------------|
|           | Pregnancies with cardiac malformations         |                                                                              | Pregnancies without cardiac malformation |                                                                              |
|           | Unexposed ( $S_{10}$ )                         | Exposed ( $S_{11}$ )                                                         | Unexposed ( $S_{00}$ )                   | Exposed ( $S_{01}$ )                                                         |
| Figure 1A | 50-70% (70% best estimate based on literature) | $S_{10}-20\%$<br>$S_{10}-10\%$<br>$S_{10}$<br>$S_{10}+10\%$<br>$S_{10}+20\%$ | 80%                                      | $S_{00}-20\%$<br>$S_{00}-10\%$<br>$S_{00}$<br>$S_{00}+10\%$<br>$S_{00}+20\%$ |
| Figure 1B | 50-70% (70% best estimate based on literature) | $S_{10}-20\%$<br>$S_{10}-10\%$<br>$S_{10}$<br>$S_{10}+10\%$<br>$S_{10}+20\%$ | 80%                                      | 80%                                                                          |

Results:

Figure 1A shows the range of plausible values for the corrected OR. Only under the most extreme scenarios of at least 45% of infants with cardiac malformations terminated among non-SSRI users and 65% terminated among SSRI users (top line) would the relative risk be larger than 1.2.

Figure 1B takes an even more extreme scenario where SSRI users have the same probability of terminating pregnancies for social reasons as non-SSRI users, but have a different probability of termination in the presence of cardiac malformations. Under these circumstances, if 30 to 50% of infants with cardiac malformations were terminated among non-SSRI users and 50 to 70% were terminated among SSRI users, the OR would reach the hypothesized 1.5 to 1.7 value (based on some meta-analyses of SSRIs and cardiac malformations)<sup>7</sup>.

It should be noted that the selection probabilities used here are most likely conservative estimates since we had restricted the study population to women with depression and had adjusted for other covariates. Such adjustment would reduce not only confounding but also selection bias if the adjusted factors were common causes of SSRI use and inclination to terminate (e.g. factors associated with depression). Also, the proportion of terminations would most likely be lower for cardiac malformations such as ventricular septal defects, which were the ones most commonly linked with SSRIs in earlier studies.

Figure 1 Corrected relative risk for the association between SSRI use during the first trimester and cardiac malformations in women with depression diagnosis. The graphs represent a range of plausible values for selection probabilities (1-probability of termination) among unexposed. The different lines represent the corrected relative risk for a range of higher or lower selection probabilities among SSRI users.

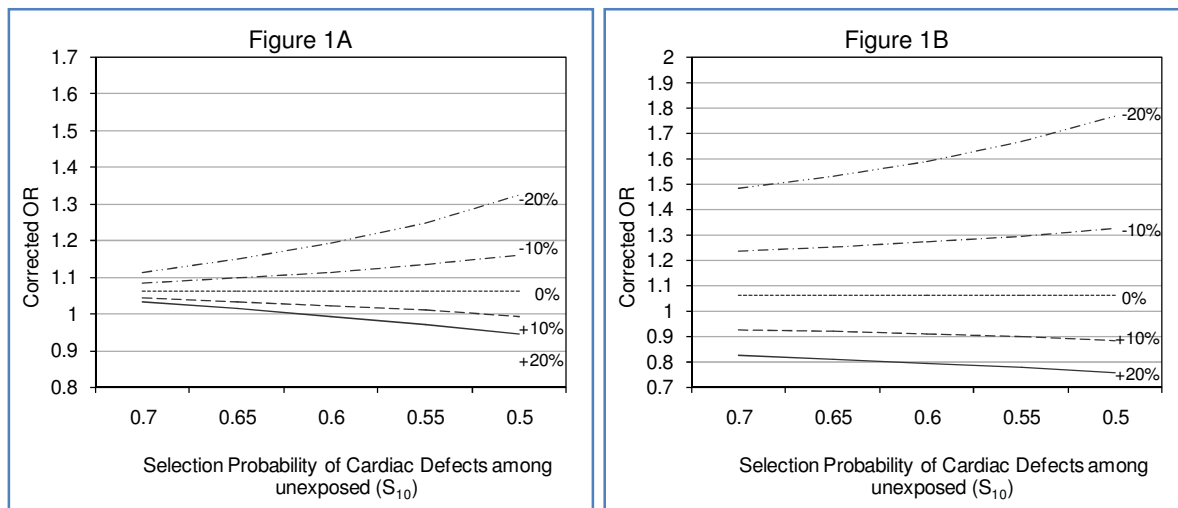

**Conclusion:**

In conclusion, findings from this sensitivity analysis show that the differences in the proportion of terminations among women with depression on SSRIs vs. those untreated within levels of covariates used in the adjustment would have to be unrealistically strong in order to dilute a relative risk of 1.5 or higher. Moreover, this selection bias would not explain the discrepancies with prior studies, since they also included live births preferentially.



## **References**

1. O'Donnell J, Shelton R. Drug therapy of depression and anxiety disorders. In: Brunton L, Chabner B, Knollmann B, eds. Goodman & Gilman's The Pharmacological Basis of therapeutics 12th ed. New York: McGraw-Hill; 2011.
2. Greenland S. Basic methods for sensitivity analysis of biases. *International Journal of Epidemiology* 1996;25:1107-16.
3. Khoury MJ, Flanders WD, James LM, Erickson JD. Human teratogens, prenatal mortality, and selection bias. *American Journal of Epidemiology* 1989;130:361-70.
4. Finer LB, Henshaw SK. Disparities in rates of unintended pregnancy in the United States, 1994 and 2001. *Perspectives on sexual and reproductive health* 2006;38:90-6.
5. Trines J, Fruitman D, Zuo KJ, Smallhorn JF, Hornberger LK, Mackie AS. Effectiveness of prenatal screening for congenital heart disease: assessment in a jurisdiction with universal access to health care. *The Canadian journal of cardiology* 2013;29:879-85.
6. Friedberg MK, Silverman NH, Moon-Grady AJ, et al. Prenatal detection of congenital heart disease. *The Journal of pediatrics* 2009;155:26-31, e1.
7. Wurst KE, Poole C, Ephross SA, Olshan AF. First trimester paroxetine use and the prevalence of congenital, specifically cardiac, defects: a meta-analysis of epidemiological studies. *Birth defects research Part A, Clinical and molecular teratology* 2010;88:159-70.
